# Supplementary material
Source: PubMed Central journal article supplement (PMC7810487)
Supplement: jci-131-141837-s107.pdf [file jci-131-141837-s107.pdf]

## SUPPLEMENTAL MATERIAL

### H. Lahm et al. Congenital heart disease risk loci identified by genome-wide association study in European patients

**Supplemental Table 1.** Possible causal variants in *MACROD2* and *GOSR2* gene loci

**Supplemental Table 2.** Analysis of loci 12q24 and 13q32 in patients with right heart lesions

**Supplemental Table 3.** Possible influence of rs11784 on expression of *GOSR2* and *WNT3*

**Supplemental Table 4.** List of candidate genes within the LD region of associated loci

**Supplemental Table 5.** Gene list for GSEA analysis

**Supplemental Table 6.** GSEA analysis

**Supplemental Table 7.** Patients for candidate gene expression analyses

**Supplemental Table 8.** Adult control patients for candidate gene expression analyses

**Supplemental Table 9.** Candidate gene knockout mouse models

**Supplemental Table 10.** Cross ethnical validation

**Supplemental Table 11.** Imputation score for all lead SNPs

**Supplemental Table 12.** Genomic inflation

**Supplemental Table 13.** Power analysis

**Supplemental Table 14.** Primers used for qRT-PCR analyses and genotyping

**Supplemental Figure 1.** Validation of rs185531658 and rs117527287 by Sanger sequencing

**Supplemental Figure 2.** SNPs associated with right heart lesions

**Supplemental Figure 3.** SNPs associated with left heart lesions

**Supplemental Figure 4.** SNPs associated with septal defects

**Supplemental Figure 5.** SNPs associated with ASD

**Supplemental Figure 6.** SNPs associated with ASDII

**Supplemental Figure 7.** SNPs associated with anomalies of thoracic arteries and veins

**Supplemental Figure 8.** Participation of CHD-associated SNP-carrying genes in signaling cascades

**Supplemental Figure 9.** Network-based functional enrichment analysis of pathways involved in cardiac development

**Supplemental Figure 10.** Identification and reclustering of mesodermal and neural crest cells of the murine cardiogenic region

**Supplemental Figure 11.** Expression of candidate genes during cardiac differentiation of human iPS cells

**Supplemental Figure 12.** Expression of *MACROD2*, *GOSR2* and *WNT3* in patient tissue with or without risk variant

**Supplemental Figure 13.** Expression of candidate genes in pediatric and adult aortic tissue

**Supplemental Figure 14.** Expression of candidate genes in pediatric and adult atrial tissue

**Supplemental Figure 15.** Identification of different cell types after single-cell RNAseq by expression of defined marker genes

**Supplemental Figure 16.** Workflow for general GWAS quality control

**Supplemental Figure 17.** Quality control steps and PCA plots to analyze population stratification

**Supplemental Table 1. Possible causal variants in *MACROD2* and *GOSR2* gene loci**

| <b>rs ID</b> | <b>Z score</b> | <b>PIP CAVIARBF</b> | <b>gene</b>    | <b>cyto band</b> | <b>CHD subgroup</b>                      |
|--------------|----------------|---------------------|----------------|------------------|------------------------------------------|
| rs17677363   | -5.3322        | 0.9999244           |                |                  |                                          |
| rs11874      | 5.40319        | 0.991485            | <i>GOSR2</i>   | 17q21.32         | anomalies of thoracic arteries and veins |
| rs76774446   | 5.32994        | 0.9874922           |                |                  |                                          |
| rs149890280  | -6.37711       | 1                   |                |                  |                                          |
| rs150246290  | 6.42989        | 1                   | <i>MACROD2</i> | 20q12.1          | transposition of the great arteries      |
| rs149467721  | 6.05662        | 0.5554932           |                |                  |                                          |
| rs77094733   | 6.02248        | 0.4444939           |                |                  |                                          |

PIP: posterior inclusion probability, CAVIARBF: CAVIAR Bayes factor, CHD: congenital heart disease

Supplemental Table 2. Analysis of loci 12q24 and 13q32 in patients with right heart lesions

|                    | ChrPosD hg19 | Strand | Chr | Pos       | N <sup>1</sup> | Effect_allele | Other_allele | DHM collective   |                   |                   |          |                 | meta-analysis (DHM + UK collective) |             |             |                       | Subgroup |                                          |
|--------------------|--------------|--------|-----|-----------|----------------|---------------|--------------|------------------|-------------------|-------------------|----------|-----------------|-------------------------------------|-------------|-------------|-----------------------|----------|------------------------------------------|
|                    |              |        |     |           |                |               |              | EAF <sup>2</sup> | Info <sup>3</sup> | BETA <sup>4</sup> | OR       | SE <sup>5</sup> | P                                   | meta_Effect | meta_StdErr | meta_P-value          |          | Direction                                |
| rs7982677 (13q32)  | 13:92988323  | +      | 13  | 92988323  | 3999           | A             | C            | 0,270024         | 0,989605          | 0,00695663        | 1,006981 | 0,0811229       | 0,931689                            | -0,0477     | 0,0522      | 0,3607                | +-       | septal defects                           |
|                    | 13:92988323  | +      | 13  | 92988323  | 3717           | A             | C            | 0,268711         | 0,989537          | -0,133944         | 0,874639 | 0,133799        | 0,311697                            | -0,1339     | 0,1338      | 0,3168                | --       | ASDII                                    |
|                    | 13:92988323  | +      | 13  | 92988323  | 5049           | A             | C            | 0,27035          | 0,989636          | -0,00429724       | 0,995712 | 0,0507463       | 0,932507                            | 0,0402      | 0,0306      | 0,1896                | +-       | all CHD                                  |
|                    | 13:92988323  | +      | 13  | 92988323  | 3786           | A             | C            | 0,268119         | 0,989515          | -0,146722         | 0,863534 | 0,112598        | 0,187516                            | -0,097      | 0,0702      | 0,1671                | --       | ASD                                      |
|                    | 13:92988323  | +      | 13  | 92988323  | 3759           | A             | C            | 0,269706         | 0,989828          | -0,0193519        | 0,980834 | 0,115665        | 0,866948                            | -0,0528     | 0,075       | 0,4814                | --       | anomalies of thoracic arteries and veins |
|                    | 13:92988323  | +      | 13  | 92988323  | 3700           | A             | C            | 0,27129          | 0,989499          | 0,127057          | 1,135482 | 0,132544        | 0,341485                            | 0,0944      | 0,0785      | 0,2295                | ++       | TGA                                      |
|                    | 13:92988323  | +      | 13  | 92988323  | 3692           | A             | C            | 0,269495         | 0,989387          | -0,0969594        | 0,907593 | 0,143157        | 0,495098                            | 0,0123      | 0,0898      | 0,8908                | +-       | left heart lesions                       |
|                    | 13:92988323  | +      | 13  | 92988323  | 3824           | A             | C            | 0,272319         | 0,989156          | 0,174637          |          | 0,0997423       | 0,0828563                           | 0,2123      | 0,047       | 6.29x10 <sup>-8</sup> | ++       | right heart lesions                      |
| rs11065987 (12q24) | 12:112072424 | +      | 12  | 112072424 | 3999           | G             | A            | 0,466492         | 1                 | 0,055953          | 1,057548 | 0,0729835       | 0,443403                            | 0,0084      | 0,0473      | 0,859                 | +-       | septal defects                           |
|                    | 12:112072424 | +      | 12  | 112072424 | 3717           | G             | A            | 0,465967         | 1                 | 0,114226          | 1,121005 | 0,115896        | 0,324546                            | -0,1142     | 0,1159      | 0,3243                | --       | ASDII                                    |
|                    | 12:112072424 | +      | 12  | 112072424 | 5049           | G             | A            | 0,46534          | 1                 | 0,00368067        | 1,003687 | 0,0453026       | 0,935247                            | -0,0281     | 0,0281      | 0,3163                | --       | all CHD                                  |
|                    | 12:112072424 | +      | 12  | 112072424 | 3786           | G             | A            | 0,465927         | 1                 | 0,0776794         | 1,080776 | 0,0975685       | 0,42613                             | 0,0363      | 0,0629      | 0,564                 | +        | ASD                                      |
|                    | 12:112072424 | +      | 12  | 112072424 | 3759           | G             | A            | 0,462623         | 1                 | -0,166374         | 0,846729 | 0,104174        | 0,108993                            | 0,1428      | 0,0683      | 0,03646               | ++       | anomalies of thoracic arteries and veins |
|                    | 12:112072424 | +      | 12  | 112072424 | 3700           | G             | A            | 0,464595         | 1                 | -0,0213772        | 0,978850 | 0,121644        | 0,860464                            | 0,0905      | 0,0736      | 0,219                 | ++       | TGA                                      |
|                    | 12:112072424 | +      | 12  | 112072424 | 3692           | G             | A            | 0,462893         | 1                 | -0,220078         | 0,802456 | 0,127457        | 0,0825705                           | 0,0746      | 0,0825      | 0,3658                | +-       | left heart lesions                       |
|                    | 12:112072424 | +      | 12  | 112072424 | 3824           | G             | A            | 0,46705          | 1                 | 0,119852          | 1,127330 | 0,0909645       | 0,187722                            | -0,2114     | 0,0443      | 1.79x10 <sup>-8</sup> | --       | right heart lesions                      |

<sup>1</sup>: sample size, <sup>2</sup>: effector allele frequency, <sup>3</sup>: info score, <sup>4</sup>:  $\beta = \ln OR$ , <sup>5</sup>: standard error of  $\beta$

### Supplemental Table 3. Possible influence of rs11784 on expression of *GOSR2* and *WNT3*

| rsid        | chr | pos_hg19  | cyto band | gene               | type           | gene/protein consequences                                             | Ensembl Regulatory Build | roadmap enhancer(tissue) | GeneHancer Interactions | geneAssociationMethods                             | GeneHancer (GH) Identifier                                                                                                                                                                                              | Gene_By_topologically association domains                                | SV   | SV PMID                                               |
|-------------|-----|-----------|-----------|--------------------|----------------|-----------------------------------------------------------------------|--------------------------|--------------------------|-------------------------|----------------------------------------------------|-------------------------------------------------------------------------------------------------------------------------------------------------------------------------------------------------------------------------|--------------------------------------------------------------------------|------|-------------------------------------------------------|
| rs35437121  | 2   | 131769448 | 2q21.1    | ARHGEF4            | protein_coding | intronic(ARHGEF4),coding(ARHGEF4)                                     |                          |                          | ARHGEF4                 | eQTLs,Distance                                     | GH02J131039,GH02J131036                                                                                                                                                                                                 | GPR148,AMER3,ARHGEF4,FAM168B,PLEKHB2,POTEE,CYP4F31P,MZT2A,TUBA3D         | gain | 25217958                                              |
| rs114503684 | 3   | 141834969 | 3q23      | TFDP2              | protein_coding | intronic(TFDP2),non-coding intronic(TFDP2)                            | Promoter Flanking Region |                          |                         |                                                    |                                                                                                                                                                                                                         | GK5,TFDP2,XRN1                                                           | gain | 19592680;21841781;21293372;25217958;25503493;21179565 |
| rs2046060   | 3   | 187852486 | 3q27.3    | RP11-430L16.1      | lincRNA        | non-coding intronic(RP11-430L16.1)                                    |                          |                          | LPP                     | C-HiC,eRNA_co-expression,eQTLs                     | GH03J187735,GH03J188081                                                                                                                                                                                                 | LPP,AC022498.1,TPRG1                                                     | gain | 17911159                                              |
|             |     |           |           |                    |                |                                                                       |                          |                          |                         |                                                    | GH03J189961,GH03J189983,GH03J189995,GH03J189999,GH03J190002,GH03J190010,GH03J190016,GH03J190024,GH03J190031,GH03J190033,GH03J190036,GH03J190040,GH03J190048,GH03J190053,GH03J190055,GH03J190062,GH03J190072,GH03J190075 |                                                                          |      |                                                       |
| rs187369228 | 3   | 189802439 | 3q28      | LEPREL1            | protein_coding | intronic(LEPREL1)                                                     |                          |                          | P3H2                    | eQTLs,C-HiC,Distance,eRNA_co-expression            | GH03J190072,GH03J190075                                                                                                                                                                                                 | CLDN1,CLDN16,TMEM207,LEPREL1                                             |      |                                                       |
| rs870142    | 4   | 4648047   | 4p16.2    | STX18-AS1          | antisense      | non-coding intronic(STX18-AS1)                                        |                          |                          |                         |                                                    |                                                                                                                                                                                                                         | TMEM128,LYAR,ZBTB49,NSG1,STX18,MSX1                                      |      |                                                       |
| rs185531658 | 5   | 113136521 | 5q22.3    | YTHDC2             | protein_coding | upstream                                                              |                          |                          |                         |                                                    |                                                                                                                                                                                                                         | KCNN2,TRIM36,PGGT18,CCDC112                                              | loss | 25217958                                              |
| rs146300195 | 5   | 128326845 | 5q23.3    | SLC27A6            | protein_coding | intronic(SLC27A6)                                                     |                          |                          | SLC27A6                 | eQTLs,Distance                                     | GH05J128965                                                                                                                                                                                                             | FBN2,SLC27A6,ISOC1,ADAMTS19,KIAA1024L                                    |      |                                                       |
| rs117527287 | 6   | 85729959  | 6q14.3    | RP3-435K13.1       | pseudogene     | upstream                                                              |                          |                          |                         |                                                    |                                                                                                                                                                                                                         | TBX18,NT5E,SNX14                                                         |      |                                                       |
| rs148563140 | 8   | 81475406  | 8q21.13   | RPSAP47            | pseudogene     | upstream                                                              |                          |                          |                         |                                                    |                                                                                                                                                                                                                         | ZBTB10                                                                   |      |                                                       |
| rs11065987  | 12  | 112072424 | 12q24.12  | BRAP               | protein_coding | downstream                                                            |                          |                          | ALDH2,ADAM1A,ATXN2      | eQTLs,eRNA_co-expression,TF_co-expression,Distance | GH12J111396,GH12J111402,GH12J111424,GH12J111466,GH12J112417                                                                                                                                                             |                                                                          |      |                                                       |
| rs7982677   | 13  | 92988323  | 13q31.3   | GPC5               | protein_coding | intronic(GPC5)                                                        |                          |                          |                         |                                                    |                                                                                                                                                                                                                         | GPC6,DCT,GPC5,TGDS                                                       | gain | 25217958                                              |
| rs138741144 | 17  | 32286564  | 17q12     | ASIC2              | protein_coding | intronic(ASIC2)                                                       |                          | H3K9me3(Right Atrium)    | ASIC2                   | C-HiC,Distance                                     | GH17J033905,GH17J033906,GH17J033908,GH17J033928,GH17J033930                                                                                                                                                             | AC005549.3,CCL2,CCL7,CCL11,CCL8,CCL13,CCL1,ASIC2                         | gain | 25217958                                              |
| rs11874     | 17  | 45017193  | 17q21.32  | GOSR2,RP11-156P1.2 | protein_coding | intronic(GOSR2),intronic(RP11-156P1.2),3downstream(GOSR2),3utr(GOSR2) |                          | H3K36me3(Left Ventricle) | KANSL1,CDCC27,GOSR2     | eQTLs,TF_co-expression,C-HiC,Distance              | GH17J047098,GH17J046922,GH17J047274,GH17J046942,GH17J046940                                                                                                                                                             | WNT3,WNT9B,GOSR2,RP11-156P1.2,RPRML,CDCC27,MYL4,ITGB3,EFCAB13,NPEPP5,NSF |      |                                                       |
| rs72917381  | 18  | 54546223  | 18q21.31  | WDR7               | protein_coding | intronic(WDR7)                                                        |                          |                          | WDR7                    | eRNA_co-expression,Distance                        | GH18J056889                                                                                                                                                                                                             | BOD1L2,ST8SIA3,ONECUT2,FECH,WDR7,NARS                                    |      |                                                       |
| rs150246290 | 20  | 15112880  | 20p12.1   | MACROD2            | protein_coding | intronic(MACROD2)                                                     |                          |                          |                         |                                                    |                                                                                                                                                                                                                         | FLRT3,KIF16B,SNRPB2,OTOR,MACROD2                                         | loss | 21841781;25118596;25217958;21293372;19592680;25503493 |

**Supplemental Table 4. List of candidate genes within the LD region of associated loci**

| gene                                                                               | chromosome         | expression pattern, potential cardiac relevance                          | reference(s)                                                                                                                                 |
|------------------------------------------------------------------------------------|--------------------|--------------------------------------------------------------------------|----------------------------------------------------------------------------------------------------------------------------------------------|
| <b>Figure 1</b>                                                                    | <b>rs185531658</b> | <b>all CHD patients</b>                                                  |                                                                                                                                              |
| <i>MCC</i> (MCC regulator of WNT signaling pathway)                                | 5q22.2             | expressed in primitive streak, cardiac mesoderm formation                | Teo et al., Stem Cells, 30:631-642 (2012)                                                                                                    |
| <i>TSSK1B</i> (testis specific serine kinase 1B)                                   | 5q22.2             | expressed in various tissue, overexpressed in heart                      |                                                                                                                                              |
| <i>YTHDC2</i> (YTH domain containing 2)                                            | 5q22.2             | mRNA widely expressed                                                    |                                                                                                                                              |
| <b>Figure 2A</b>                                                                   | <b>rs150246290</b> | <b>transposition of the great arteries</b>                               |                                                                                                                                              |
| <i>MACROD2</i> (MACRO Domain Containing 2)                                         | 20p12.1            | mRNA widely expressed                                                    | see manuscript                                                                                                                               |
| <i>MACROD2-AS1</i> (MACROD2 anti-sense RNA1)                                       | 20p12.1            | RNA widely expressed (non-protein coding)                                |                                                                                                                                              |
| <b>Figure 2B</b>                                                                   | <b>rs148563140</b> | <b>transposition of the great arteries</b>                               |                                                                                                                                              |
| <i>ZBTB10</i> (zinc finger and BTB containing domain 10)                           | 8q21.13            | mRNA widely expressed                                                    |                                                                                                                                              |
| <i>ZNF704</i> (zinc finger protein 704)                                            | 8q21.13            | mRNA widely expressed, protein in fetal and adult heart                  |                                                                                                                                              |
| <i>PAG1</i> (phosphoprotein membrane anchor with glycosphingolipid microdomains 1) | 8q21.13            | mRNA widely expressed                                                    |                                                                                                                                              |
| <b>Figure 3</b>                                                                    | <b>rs11874</b>     | <b>thoracic arteries and veins</b>                                       |                                                                                                                                              |
| <i>ARL17B</i> (ADP ribosylation factor like GTPase 17b)                            | 17q21.31           | mRNA widely expressed                                                    |                                                                                                                                              |
| <i>WNT3</i> (Wnt family member 3)                                                  | 17q21.31-32        | mRNA widely expressed, primitive streak and mesoderm formation           | Liu et al., Nature Genet. 22:361-365 (1999); see manuscript                                                                                  |
| <i>WNT9B</i> (Wnt family member 9B)                                                | 17q21.32           | mRNA widely expressed including atrioventricular node cells              | Alfieri et al., Dev. Biol., 338:127 (2010)                                                                                                   |
| <i>GOSR2</i> (Golgi SNAP receptor complex member 2)                                | 17q21.32           | mRNA widely expressed, coronary artery disease and myocardial infarction | see manuscript                                                                                                                               |
| <i>MIR5089</i> (micro RNA 5089)                                                    | 17q21.32           | RNA weakly expressed in different tissues, but not in heart              |                                                                                                                                              |
| <i>RPRML</i> (reprimino like)                                                      | 17q21.32           | mRNA widely expressed                                                    |                                                                                                                                              |
| <i>CDC27</i> (cell division cycle 27)                                              | 17q21.32           | mRNA widely expressed, protein in fetal heart                            |                                                                                                                                              |
| <i>MYL4</i> (myosin light chain 4)                                                 | 17q21.32           | mRNA expressed in fetal heart and cardiomyocytes, atrial fibrillation    | Orr et al., Nat. Commun., 12:11303 (2016)                                                                                                    |
| <b>Supplemental Figure 2A</b>                                                      | <b>rs11065987</b>  | <b>right heart lesions (TOF)</b>                                         |                                                                                                                                              |
| <i>CUX2</i> (Cut Like Homebox 2)                                                   | 12q24.11-12        | mRNA widely expressed                                                    | Liu et al., Can J Cardiol., 33; 443-449 (2017); Lin et al., Sci Rep. 7: 40377 (2017); Sinner et al., Circulation, 130:1225-35 (2014)         |
| <i>MIR6760</i> (micro RNA 6760)                                                    | 12q24.12           | no data on RNA expression                                                |                                                                                                                                              |
| <i>FAM109A</i> (PH Domain Containing Endocytic Trafficking Adaptor 1)              | 12q24.12           | no data on RNA expression                                                |                                                                                                                                              |
| <i>SH2B3</i> (SH2B Adaptor Protein 3)                                              | 12q24.12           | mRNA widely expressed, protein in heart                                  | Wang et al., Curr Mol Med., Epub ahead of print; Keefe et al., Hypertension, 73:497-503; Hong et al., Medicine (Baltimore), 97:e13436 (2018) |
| <i>ATXN2</i> (Ataxin 2)                                                            | 12q24.12           | mRNA widely expressed, protein in fetal heart                            | Liu et al., Oncotarget., 8(63); 106976-106988 (2017); Lv et al., J Mol Cell Cardiol., 112:1-7 (2017)                                         |
| <i>BRAP</i> (BRCA1 Associated Protein)                                             | 12q24.12           | mRNA widely expressed                                                    | Volland et al., Cardiovasc Res. Epub ahead of print                                                                                          |

| gene                                                                 | chromosome         | expression pattern, potential cardiac relevance                                  | reference(s)                                                                                                        |
|----------------------------------------------------------------------|--------------------|----------------------------------------------------------------------------------|---------------------------------------------------------------------------------------------------------------------|
|                                                                      |                    |                                                                                  | (2019); Nozynski et al., Transplant Proc., 48;1746-50 (2016)                                                        |
| <i>ACAD10</i> (Acyl-CoA Dehydrogenase Family Member 10)              | 12q24.12           | mRNA widely expressed, protein in heart and fetal heart                          |                                                                                                                     |
| <i>ALDH2</i> (Aldehyde Dehydrogenase 2 Family Member)                | 12q24.12           | mRNA widely expressed, protein widely expressed and in heart and fetal heart     | Chen et al., Adv Exp Med Biol., 1193; 53-67 (2019)                                                                  |
| <i>ADAM1A</i> (ADAM Metallopeptidase Domain 1A (Pseudogene))         | 12q24.12-13        | mRNA widely expressed                                                            |                                                                                                                     |
| <i>MAPKAPK5</i> (MAPK Activated Protein Kinase 5)                    | 12q24.12-13        | mRNA widely expressed, protein in heart                                          | Nawaito et al., Am J Physiol Heart Circ Physiol., 313;H46-H58 (2017); Dingar et al., Cell Signal, 22;1063-75 (2010) |
| <i>MIR6761</i> (micro RNA 6761)                                      | 12q24.12           | no data on RNA expression                                                        |                                                                                                                     |
| <i>MAPKAPK5-AS1</i> (MAPKAPK5 Antisense RNA1)                        | 12q24.12           | RNA widely expressed                                                             |                                                                                                                     |
| <i>TMEM116</i> (Transmembrane Protein 116)                           | 12q24.13           | mRNA widely expressed                                                            |                                                                                                                     |
| <i>ERP29</i> (Endoplasmic Reticulum Protein 29)                      | 12q24.13           | mRNA widely expressed, protein widely expressed and in heart and fetal heart     | Su et al., Pulm. Circ., 5;481-497 (2015)                                                                            |
| <i>NAA25</i> (N(Alpha)-Acetyltransferase 25, NatB Auxiliary Subunit) | 12q24.13           | mRNA widely expressed, protein in fetal heart                                    |                                                                                                                     |
| <i>TRAFDI</i> (TRAF-Type Zinc Finger Domain Containing 1)            | 12q24.13           | mRNA widely expressed, protein in heart and fetal heart                          |                                                                                                                     |
| <i>MIR3657</i> (micro RNA 3657)                                      | 12q24.13           | no data on RNA expression                                                        |                                                                                                                     |
| <b>Supplemental Figure 2B</b>                                        | <b>rs7982677</b>   | <b>right heart lesions (TOF)</b>                                                 |                                                                                                                     |
| <i>GPC5-AS2</i> (GPC5 Antisense RNA 2)                               | 13q31.3            | mRNA expressed in heart                                                          |                                                                                                                     |
| <b>Supplemental Figure 2C</b>                                        | <b>rs146300195</b> | <b>right heart lesions</b>                                                       |                                                                                                                     |
| <i>SLC27A6</i> (solute carrier family 27 member 6)                   | 5q23.3             | mRNA widely expressed, heart failure                                             | Auinger et al., Br. J. Nutr., 107;1422-1428 (2012)                                                                  |
| <i>ISOC1</i> (isochorismatase domain containing 1)                   | 5q23.3             | mRNA widely expressed                                                            |                                                                                                                     |
| <i>MIR4633</i> (micro RNA 4633)                                      | 5q23.3             | RNA weakly expressed in different tissues, including heart                       |                                                                                                                     |
| <i>MIR4460</i> (micro RNA 4460)                                      | 5q23.3             | RNA only detectable in blood and esophagus                                       |                                                                                                                     |
| <b>Supplemental Figure 3A</b>                                        | <b>rs35437121</b>  | <b>left heart lesions</b>                                                        |                                                                                                                     |
| <i>AMER3</i> (APC membrane recruitment protein 3)                    | 2q21.1             | RNA weakly expressed in different tissues, protein in fetal heart and adipocytes |                                                                                                                     |
| <i>ARHGEF4</i> (Rho guanine exchange factor 4)                       | 2q21.1             | mRNA widely expressed                                                            |                                                                                                                     |
| <i>FAM168B</i> (family with sequence similarity 168 member B)        | 2q21.1             | mRNA widely expressed                                                            |                                                                                                                     |
| <i>PLEKHB2</i> (pleckstrin homology domain containing B2)            | 2q21.1             | mRNA widely expressed                                                            |                                                                                                                     |
| <i>POTEE</i> (POTE ankyrin domain family member E)                   | 2q21.1             | mRNA widely expressed, protein in heart                                          |                                                                                                                     |
| <i>LOC440910</i> (uncharacterized LOC440910)                         | 2q21.1             | no data on RNA expression                                                        |                                                                                                                     |
| <i>WTH3DI</i> (= RAB6D, member ras oncogene family)                  | 2q21.1             | no data on mRNA expression                                                       |                                                                                                                     |
| <i>MZT2A</i> (mitotic spindle organizing protein 2A)                 | 2q21.1             | mRNA widely expressed                                                            |                                                                                                                     |

| gene                                                                                                | chromosome         | expression pattern, potential cardiac relevance                       | reference(s)                                     |
|-----------------------------------------------------------------------------------------------------|--------------------|-----------------------------------------------------------------------|--------------------------------------------------|
| <i>NOC2LP2</i> (NOC2 like nucleolar associated transcriptional repressor pseudogene 2)              | 2q21.1             | pseudogene                                                            |                                                  |
| <i>LINC01120</i> (long intergenic non-protein coding RNA 1120)                                      | 2q21.1             | ncRNA widely expressed                                                |                                                  |
| <i>TUBA3D</i> (tubulin alpha 3d)                                                                    | 2q21.1             | mRNA widely expressed, cardiac arrhythmia                             | Friedman et al., NPJ Genom. Med., 3;9 (2018)     |
| <i>MIR4784</i> (micro RNA 4784)                                                                     | 2q21.1             | RNA weakly expressed in different tissues                             |                                                  |
| <i>LOC150776</i> (sphingomyelin phosphodiesterase 4, neutral membrane (neutral sphingomyelinase-3)) | 2q21.1             | pseudogene                                                            |                                                  |
| <b>Supplemental Figure 3B</b>                                                                       | <b>rs114503684</b> | <b>left heart lesions</b>                                             |                                                  |
| <i>LOC646730</i> (LINC02618)                                                                        | 3q23               | no data on mRNA expression                                            |                                                  |
| <i>RNF7</i> (ring finger protein 7)                                                                 | 3q23               | mRNA widely expressed                                                 |                                                  |
| <i>GRK7</i> (G protein coupled receptor kinase 7)                                                   | 3q23               | mRNA widely expressed                                                 |                                                  |
| <i>ATP1B3</i> (ATPase Na <sup>+</sup> /K <sup>+</sup> transporting subunit beta 3)                  | 3q23               | mRNA widely expressed                                                 |                                                  |
| <i>LOC646730</i> (LINC02618)                                                                        | 3q23               | no data on mRNA expression                                            |                                                  |
| <i>TFDP2</i> (transcription factor Dp-2)                                                            | 3q23               | mRNA widely expressed                                                 |                                                  |
| <i>GK5</i> (glycerol kinase 5)                                                                      | 3q23               | mRNA widely expressed                                                 |                                                  |
| <b>Supplemental Figure 3C</b>                                                                       | <b>rs2046060</b>   | <b>left heart lesions</b>                                             |                                                  |
| <i>LPP-AS2</i> (LPP antisense RNA 2)                                                                | 3q27.3             | RNA widely expressed                                                  |                                                  |
| <i>FLJ42393</i> (uncharacterized LOC401105)                                                         | 3q27.3             | ncRNA widely expressed                                                |                                                  |
| <i>LPP</i> (LIM domain containing preferred translocation partner in lipoma)                        | 3q27.3-q28         | mRNA widely expressed                                                 |                                                  |
| <b>Supplemental Figure 4A</b>                                                                       | <b>rs185531658</b> | <b>septal defects</b>                                                 |                                                  |
| see above (Figure 1)                                                                                |                    |                                                                       |                                                  |
| <b>Supplemental Figure 4B</b>                                                                       | <b>rs138741144</b> | <b>septal defects</b>                                                 |                                                  |
| <i>ASIC2</i> (acid sensing ion channel subunit 2)                                                   | 17q11.2-q12        | mRNA widely expressed, protein in heart                               |                                                  |
| <i>AA06</i> (uncharacterized LOC100506677)                                                          | 17q12              | pseudogene                                                            |                                                  |
| <b>Supplemental Figure 5</b>                                                                        | <b>rs870142</b>    | <b>ASD</b>                                                            |                                                  |
| <i>STX18-AS1</i> (STX18 antisense RNA 1 (head to head))                                             | 4p16.2             | ncRNA widely expressed                                                |                                                  |
| <i>SNORD162</i> (small nucleolar RNA, C/D box 162)                                                  | 4p16.2             | no data on RNA expression                                             |                                                  |
| <b>Supplemental Figure 6A</b>                                                                       | <b>rs72917381</b>  | <b>ASDII</b>                                                          |                                                  |
| <i>TXNLI</i> (thioredoxin like 1)                                                                   | 18q21.31           | mRNA widely expressed, lower expression in RV                         | Su et al., Pulm. Circ., 5;481-497 (2015)         |
| <i>WDR7</i> (WD repeat domain 7)                                                                    | 18q21.31           | mRNA widely expressed                                                 |                                                  |
| <b>Supplemental Figure 6B</b>                                                                       | <b>rs187369228</b> | <b>ASDII</b>                                                          |                                                  |
| <i>TP63</i> (tumor protein 63)                                                                      | 3q28               | mRNA widely expressed, arrhythmogenic cardiomyopathy                  | Poloni et al., Heart Rhythm, 16;773-780 (2019)   |
| <i>MIR944</i> (micro RNA 944)                                                                       | 3q28               | RNA weakly expressed in skeletal muscle, esophagus and skin           |                                                  |
| <i>LEPRELI</i> (=P3H2, proly 3 hydroxylase 2)                                                       | 3q28               | protein expressed in heart                                            |                                                  |
| <b>Supplemental Figure 7</b>                                                                        | <b>rs117527287</b> | <b>thoracic arteries and veins</b>                                    |                                                  |
| <i>TBX18-AS1</i> (TBX18 antisense RNA 1)                                                            | 6q14.3             | no data on RNA expression                                             |                                                  |
| <i>TBX18</i> (T-box 18)                                                                             | 6q14.3             | mRNA widely expressed, protein in heart and lung, cardiac development | Kapoor et al., Nat. Biotechnol., 31;54-62 (2013) |
| <i>LOC101928820</i> (long intergenic non-protein coding)                                            | 6q14.3             | no data on RNA expression                                             |                                                  |

| gene                               | chromosome | expression pattern, potential cardiac relevance  | reference(s)                                           |
|------------------------------------|------------|--------------------------------------------------|--------------------------------------------------------|
| RNA 2535)                          |            |                                                  |                                                        |
| <i>NT5E</i> (5' nucleotidase ecto) | 6q14.3     | mRNA widely expressed, calcification of arteries | Hellman et al., Medicine (Baltimore), 98:e15065 (2019) |
| <i>SNX14</i> (sorting nexin 14)    | 6q14.3     | mRNA widely expressed                            |                                                        |



## Supplemental Table 5. Gene list for GSEA analysis

| CHD population              | gene                                                                                                                                                                                                                       |
|-----------------------------|----------------------------------------------------------------------------------------------------------------------------------------------------------------------------------------------------------------------------|
| all                         | <i>GRM4</i>                                                                                                                                                                                                                |
| ASD                         | <i>IGSF21</i><br><i>LEPREL1</i><br><i>MAML3</i><br><i>ADAMTSL1</i><br><i>RHBDF2</i>                                                                                                                                        |
| ASDII                       | <i>LEPREL1</i><br><i>TMTC2</i><br><i>WDR7</i>                                                                                                                                                                              |
| left heart lesions          | <i>ARHGEF4</i><br><i>TRAF3IP1</i><br><i>TFDP2</i><br><i>LPP</i><br><i>ZFC3H1</i><br><i>THAP2</i><br><i>RP11-293114.2</i><br><i>SMCHD1</i>                                                                                  |
| right heart lesions         | <i>FBN2</i><br><i>SLC27A6</i><br><i>ISOC1</i><br><i>FLT4</i>                                                                                                                                                               |
| septal defects              | <i>CACNA2D1</i><br><i>AKR1C1</i>                                                                                                                                                                                           |
| thoracic arteries and veins | <i>INHBA</i><br><i>GATA4</i><br><i>C8orf49</i><br><i>NEIL2</i><br><i>FDFT1</i><br><i>RP11-297N6.4</i><br><i>CTSB</i><br><i>WNT9B</i><br><i>GOSR2</i><br><i>RP11-156P1.2</i><br><i>RPRML</i><br><i>CDC27</i><br><i>MYL4</i> |
| TGA                         | <i>HS6ST1</i><br><i>GABRA6</i><br><i>GABRA1</i><br><i>ZNF704</i><br><i>TMEM74</i><br><i>GATA3</i><br><i>DLG2</i><br><i>MACROD2</i>                                                                                         |

red: genes with genome-wide significance. Cutoff value for all genes  $p < 0.0005$

### Supplemental Table 6. GSEA analysis

| Gene set name                                               | # genes | <i>p</i> value        | FDR <i>q</i> value    |
|-------------------------------------------------------------|---------|-----------------------|-----------------------|
| cell-cell signaling                                         | 8       | $3.41 \times 10^{-7}$ | $2.02 \times 10^{-3}$ |
| embryonic organ development                                 | 6       | $1.59 \times 10^{-6}$ | $2.64 \times 10^{-3}$ |
| anatomical structure formation<br>involved in morphogenesis | 8       | $1.79 \times 10^{-6}$ | $2.64 \times 10^{-3}$ |
| embryonic morphogenesis                                     | 6       | $8.03 \times 10^{-6}$ | $7.83 \times 10^{-3}$ |

**Supplemental Table 7. Patients for candidate gene expression analyses**

| ID   | sex    | age <sup>1</sup> | genotype <sup>2</sup> | genotyped by | tissue | diagnosis                                                             | STS code | gene expression    |
|------|--------|------------------|-----------------------|--------------|--------|-----------------------------------------------------------------------|----------|--------------------|
| 604  | m      | 5 d              | wt                    | GWAS         | aorta  | TGA, IVS                                                              | 83       |                    |
| 687  | m      | 6 d              | wt                    | GWAS         | aorta  | TGA, IVS                                                              | 83       |                    |
| 690  | f      | 9 d              | wt                    | GWAS         | aorta  | TGA, IVS                                                              | 83       |                    |
| 707  | m      | 9 d              | wt                    | GWAS         | aorta  | TGA, IVS                                                              | 83       |                    |
| 726  | m      | 6 d              | wt                    | GWAS         | aorta  | TGA, IVS                                                              | 83       |                    |
| 745  | m      | 4 d              | wt                    | GWAS         | aorta  | TGA, IVS                                                              | 83       |                    |
| 841  | m      | 7 d              | wt                    | GWAS         | aorta  | TGA, IVS                                                              | 83       |                    |
| 937  | m      | 6 d              | wt                    | GWAS         | aorta  | TGA, IVS                                                              | 83       |                    |
| 1048 | m      | 6 d              | wt                    | GWAS         | aorta  | TGA, IVS                                                              | 83       |                    |
| 1638 | m      | 7 d              | wt                    | GWAS         | aorta  | TGA, IVS                                                              | 83       |                    |
| 2594 | m      | 6 d              | wt                    | GWAS         | aorta  | TGA, VSD                                                              | 85       |                    |
| 2771 | f      | 8 d              | wt                    | GWAS         | aorta  | TGA, IVS                                                              | 83       |                    |
| 2773 | m      | 9 d              | wt                    | GWAS         | aorta  | TGA, IVS                                                              | 83       |                    |
| 3234 | m      | 10 d             | wt                    | GWAS         | aorta  | TGA, VSD                                                              | 85       |                    |
| 3755 | f      | 9 d              | wt                    | GWAS         | aorta  | TGA, IVS                                                              | 83       |                    |
| 3883 | m      | 8 d              | wt                    | GWAS         | aorta  | TGA, IVS                                                              | 83       |                    |
| 703  | m      | 7 d              | het                   | GWAS         | aorta  | TGA, IVS                                                              | 83       |                    |
| 859  | m      | 9 d              | het                   | GWAS         | aorta  | TGA, IVS                                                              | 83       |                    |
| 1755 | m      | 5 d              | het                   | GWAS         | aorta  | TGA, IVS                                                              | 83       | <i>MACROD2</i>     |
| 2812 | m      | 6 d              | het                   | GWAS         | aorta  | TGA, IVS                                                              | 83       |                    |
| 3898 | m      | 8 d              | het <sup>3</sup>      | GWAS         | aorta  | TGA, VSD                                                              | 85       |                    |
| 605  | m      | 10 d             | wt                    | PCR          | aorta  | TGA, IVS                                                              | 83       |                    |
| 1026 | f      | 6 d              | wt                    | PCR          | aorta  | TGA, IVS                                                              | 83       |                    |
| 1663 | f      | 18 d             | wt                    | PCR          | aorta  | TGA, IVS                                                              | 83       |                    |
| 1665 | f      | 13 d             | wt                    | PCR          | aorta  | TGA, VSD                                                              | 85       |                    |
| 1789 | m      | 12 d             | wt                    | PCR          | aorta  | TGA, IVS                                                              | 83       |                    |
| 2855 | f      | 9 d              | wt                    | PCR          | aorta  | TGA, IVS                                                              | 83       |                    |
| 2982 | m      | 10 d             | wt                    | PCR          | aorta  | TGA, IVS                                                              | 83       |                    |
| 3156 | m      | 14 d             | wt                    | PCR          | aorta  | TGA, IVS                                                              | 83       |                    |
| 3589 | m      | 6 d              | wt                    | PCR          | aorta  | TGA, IVS                                                              | 83       |                    |
| 3624 | m      | 13 d             | het                   | PCR          | aorta  | TGA, IVS                                                              | 83       |                    |
| 3789 | m      | 8 d              | wt                    | PCR          | aorta  | ccTGA                                                                 | 82       |                    |
| 4063 | m      | 30 d             | wt                    | PCR          | aorta  | TGA, IVS                                                              | 83       |                    |
| 4114 | m      | 7 d              | wt                    | PCR          | aorta  | TGA, VSD                                                              | 85       |                    |
| 4639 | m      | 6 d              | wt                    | PCR          | aorta  | TGA, VSD                                                              | 85       |                    |
|      | 28m/7f | 8 (4-30)         |                       |              |        |                                                                       |          |                    |
| 300  | m      | 12378 d          | wt                    | GWAS         | aorta  | aortic aneurysm (including pseudoaneurysm)                            | 102      |                    |
| 801  | m      | 78 d             | wt                    | GWAS         | aorta  | coronary artery anomaly, anomalous pulmonary origin (includes ALCAPA) | 159      |                    |
| 821  | m      | 3 d              | wt                    | GWAS         | ductus | coarctation of aorta                                                  | 95       |                    |
| 1949 | m      | 6 d              | wt                    | GWAS         | ductus | VSD + aortic arch hypoplasia                                          | 168      |                    |
| 2061 | f      | 8 d              | wt                    | GWAS         | ductus | interrupted aortic arch                                               | 98       |                    |
| 2330 | f      | 32 d             | wt                    | GWAS         | ductus | VSD + aortic arch hypoplasia                                          | 168      | <i>GOSR2, WNT3</i> |
| 2405 | f      | 87 d             | wt                    | GWAS         | ductus | VSD + aortic arch hypoplasia                                          | 168      |                    |
| 2529 | f      | 9673 d           | wt                    | GWAS         | aorta  | coarctation of aorta                                                  | 95       |                    |
| 3466 | m      | 7 d              | wt                    | GWAS         | ductus | coarctation of aorta                                                  | 95       |                    |
| 3815 | f      | 8 d              | wt                    | GWAS         | ductus | coarctation of aorta                                                  | 95       |                    |
| 3992 | m      | 120 d            | wt                    | GWAS         | ductus | coarctation of aorta                                                  | 95       |                    |
| 771  | m      | 3 d              | het                   | GWAS         | ductus | aortic arch hypoplasia                                                | 96       |                    |
| 1308 | m      | 5455 d           | het                   | GWAS         | aorta  | aortic aneurysm (including pseudoaneurysm)                            | 102      |                    |
| 1461 | m      | 4 d              | het                   | GWAS         | ductus | coarctation of aorta                                                  | 95       |                    |

| ID      | sex | age <sup>1</sup> | genotype <sup>2</sup> | genotyped by | tissue       | diagnosis               | STS code | gene expression    |  |
|---------|-----|------------------|-----------------------|--------------|--------------|-------------------------|----------|--------------------|--|
| 2329    | m   | 5 d              | het                   | GWAS         | ductus       | aortic arch hypoplasia  | 96       |                    |  |
| 3961    | f   | 4 d              | het                   | GWAS         | ductus       | coarctation of aorta    | 95       |                    |  |
| 867     | m   | 11 d             | het                   | PCR          | aorta        | coarctation of aorta    | 95       |                    |  |
| 2754    | m   | 8 d              | wt                    | PCR          | ductus       | aortic arch hypoplasia  | 96       |                    |  |
| 2993    | f   | 3 d              | hom <sup>4</sup>      | PCR          | ductus       | coarctation of aorta    | 95       | <i>GOSR2</i> ,     |  |
| 3754    | f   | 7 d              | het                   | PCR          | ductus       | interrupted aortic arch | 98       | <i>WNT3</i>        |  |
| 4038    | f   | 6 d              | het <sup>5</sup>      | PCR          | aorta        | aortic arch hypoplasia  | 96       |                    |  |
| 4038    | f   | 6 d              | het <sup>5</sup>      | PCR          | ductus       | aortic arch hypoplasia  | 96       |                    |  |
| 4180    | m   | 60 d             | hom                   | PCR          | aorta        | coarctation of aorta    | 95       |                    |  |
| 13m/10f |     | 8 (3-12378)      |                       |              |              |                         |          |                    |  |
| 27      | f   | 1465 d           |                       |              | right atrium | HLHS                    | 69       |                    |  |
| 266     | f   | 9 d              |                       |              | right atrium | HLHS                    | 69       |                    |  |
| 474     | f   | 540 d            |                       |              | right atrium | HLHS                    | 69       |                    |  |
| 2677    | m   | 19 d             |                       |              | right atrium | HLHS                    | 69       |                    |  |
| 2684    | m   | 8 d              |                       |              | right atrium | HLHS                    | 69       |                    |  |
| 3007    | f   | 5 d              |                       |              | right atrium | HLHS                    | 69       |                    |  |
| 3582    | f   | 10 d             |                       |              | right atrium | HLHS                    | 69       | <i>ARHGEF4</i> ,   |  |
| 5347    | f   | 6 d              |                       |              | right atrium | HLHS                    | 69       | <i>TFDP2</i>       |  |
| 2m/6f   |     | 9.5 (5-1465)     |                       |              |              |                         |          |                    |  |
| 1531    | m   | 6 d              |                       |              | aorta        | HLHS                    | 69       |                    |  |
| 3258    | f   | 6 d              |                       |              | aorta        | HLHS                    | 69       |                    |  |
| 4221    | m   | 7 d              |                       |              | aorta        | HLHS                    | 69       |                    |  |
| 5942    | m   | 8 d              |                       |              | aorta        | HLHS                    | 69       |                    |  |
| 6179    | m   | 7 d              |                       |              | aorta        | HLHS                    | 69       |                    |  |
| 4m/1f   |     | 7 (6-8)          |                       |              |              |                         |          |                    |  |
| 3526    | m   | 140 d            |                       |              | right atrium | TOF                     | 28       |                    |  |
| 3951    | f   | 1004 d           |                       |              | right atrium | TOF                     | 28       |                    |  |
| 4499    | f   | 342 d            |                       |              | right atrium | TOF                     | 28       |                    |  |
| 4618    | m   | 106 d            |                       |              | right atrium | TOF                     | 28       | <i>SLC27A6</i>     |  |
| 4758    | m   | 113 d            |                       |              | right atrium | TOF                     | 28       |                    |  |
| 6122    | m   | 130 d            |                       |              | right atrium | TOF                     | 28       |                    |  |
| 4m/2f   |     | 135 (106–1004)   |                       |              |              |                         |          |                    |  |
| 28      | f   | 2272 d           |                       |              | right atrium | ASDII                   | 2        |                    |  |
| 92      | f   | 4262 d           |                       |              | right atrium | ASDII                   | 2        |                    |  |
| 98      | f   | 824 d            |                       |              | right atrium | ASDII                   | 2        |                    |  |
| 332     | m   | 2980 d           |                       |              | right atrium | ASDII                   | 2        |                    |  |
| 614     | f   | 5183 d           |                       |              | right atrium | ASDII                   | 2        |                    |  |
| 739     | f   | 1887 d           |                       |              | right atrium | ASDII                   | 2        |                    |  |
| 2930    | f   | 2600 d           |                       |              | right atrium | ASDII                   | 2        | <i>ASIC2</i> ,     |  |
| 3586    | f   | 1069 d           |                       |              | right atrium | ASDII                   | 2        | <i>STX18-AS1</i> , |  |
| 5321    | m   | 692 d            |                       |              | right atrium | ASDII                   | 2        | <i>STX18</i> ,     |  |
| 6166    | f   | 6 d              |                       |              | right atrium | ASDII                   | 2        | <i>MSC1</i> ,      |  |
| 2m/8f   |     | 2079.5 (6–5183)  |                       |              |              |                         |          |                    |  |
| 5352    | m   | 11 d             |                       |              | aorta        | ASDII                   | 2        | <i>P3H2</i> ,      |  |
| 5387    | f   | 9 d              |                       |              | aorta        | ASDII                   | 2        | <i>WDR7</i>        |  |
| 5632    | m   | 8 d              |                       |              | aorta        | ASDII                   | 2        |                    |  |
| 5817    | m   | 7 d              |                       |              | aorta        | ASDII                   | 2        |                    |  |
| 5920    | m   | 4 d              |                       |              | aorta        | ASDII                   | 2        |                    |  |
| 5973    | m   | 7 d              |                       |              | aorta        | ASDII                   | 2        |                    |  |
| 5m/1f   |     | 7.5 (4–11)       |                       |              |              |                         |          |                    |  |

<sup>1</sup> at the time of operation, <sup>2</sup> *MACROD2* locus for all four SNPs wt: wild-type, het: heterozygous, <sup>3</sup> only rs149890280 and rs150246290 are heterozygous, <sup>4</sup> *GOSR2* locus for all three SNPs wt: wild-type, het: heterozygous, hom: homozygous, <sup>5</sup> only rs17677363 is heterozygous. HLHS: hypoplastic left heart syndrome

**Supplemental Table 8. Adult control patients for candidate gene expression analyses**

| ID    | sex    | age <sup>1</sup> | tissue       | type of OP  | diagnosis                       | tested for expression of                                                                                                      |
|-------|--------|------------------|--------------|-------------|---------------------------------|-------------------------------------------------------------------------------------------------------------------------------|
| A463  | m      | 77 y             | aorta        | CABG        | atherosclerotic heart disease   |                                                                                                                               |
| A3677 | m      | 76 y             | aorta        | CABG        | atherosclerotic heart disease   |                                                                                                                               |
| A4613 | m      | 57 y             | aorta        | CABG        | atherosclerotic heart disease   |                                                                                                                               |
| A4861 | f      | 79 y             | aorta        | AVR + aorta | aortic insufficiency            | <i>GOSR2,</i><br><i>MACROD2,</i><br><i>WNT3</i>                                                                               |
| A4872 | f      | 82 y             | aorta        | AVR + aorta | aortic insufficiency            |                                                                                                                               |
| A4877 | f      | 67 y             | aorta        | aorta       | aortic aneurysm with dissection |                                                                                                                               |
| A4902 | m      | 78 y             | aorta        | CABG        | atherosclerotic heart disease   |                                                                                                                               |
| A5199 | m      | 71 y             | aorta        | CABG        | atherosclerotic heart disease   |                                                                                                                               |
| A5356 | m      | 57 y             | aorta        | CABG        | atherosclerotic heart disease   |                                                                                                                               |
| A5644 | m      | 53 y             | aorta        | CABG        | atherosclerotic heart disease   |                                                                                                                               |
|       | 7m/3f  | 73.5 (53 – 82)   |              |             |                                 |                                                                                                                               |
| A3100 | m      | 59               | aorta        | AVR + aorta | aortic insufficiency            |                                                                                                                               |
| A3111 | m      | 41               | aorta        | Aorta       | aortic aneurysm                 |                                                                                                                               |
| A345  | m      | 58               | aorta        | Aorta       | aortic insufficiency            |                                                                                                                               |
| A3562 | m      | 48               | aorta        | Aorta       | aortic insufficiency            |                                                                                                                               |
| A4472 | m      | 53               | aorta        | Aorta       | aortic insufficiency            |                                                                                                                               |
| A4989 | m      | 42               | aorta        | AVR + aorta | aortic insufficiency            |                                                                                                                               |
| A5072 | m      | 60               | aorta        | AVR + aorta | aortic insufficiency            |                                                                                                                               |
| A5283 | f      | 57               | aorta        | AVR + aorta | aortic insufficiency            |                                                                                                                               |
| A5851 | f      | 38               | aorta        | AVR + aorta | combined aortic vitium          | <i>ARHGEF4,</i><br><i>TFDP2, ASIC2,</i><br><i>STX18-AS1,</i><br><i>STX18, MSX1,</i><br><i>LEPREL1</i><br><i>(=P3H2), WDR7</i> |
| A5892 | m      | 51               | aorta        | AVR + aorta | aortic stenosis                 |                                                                                                                               |
| A6382 | m      | 52               | aorta        | AVR + aorta | aortic insufficiency            |                                                                                                                               |
| A6478 | m      | 64               | aorta        | AVR + aorta | aortic insufficiency            |                                                                                                                               |
| A6641 | m      | 49               | aorta        | AVR + aorta | combined aortic vitium          |                                                                                                                               |
| A7338 | m      | 53               | aorta        | AVR + aorta | aortic insufficiency            |                                                                                                                               |
|       | f      |                  | aorta        |             | coronary heart disease          |                                                                                                                               |
| A7711 |        | 64               |              | AVR + aorta | (unspecified)                   |                                                                                                                               |
| A7741 | f      | 66               | aorta        | AVR + aorta | aortic insufficiency            |                                                                                                                               |
| A7857 | m      | 55               | aorta        | AVR + aorta | aortic insufficiency            |                                                                                                                               |
| A8307 | m      | 58               | aorta        | AVR + aorta | aortic stenosis                 |                                                                                                                               |
| A8454 | m      | 68               | aorta        | AVR + aorta | aortic insufficiency            |                                                                                                                               |
| A8684 | m      | 56               | aorta        | AVR + aorta | aortic insufficiency            |                                                                                                                               |
|       | 16m/4f | 55.5 (38 – 68)   |              |             |                                 |                                                                                                                               |
| A4419 | m      | 51               | right atrium | AVR         | aortic stenosis                 |                                                                                                                               |
| A4438 | f      | 64               | right atrium | AVR         | aortic stenosis                 |                                                                                                                               |
| A4885 | m      | 54               | right atrium | AVR         | aortic stenosis                 |                                                                                                                               |
| A4968 | f      | 55               | right atrium | AVR         | aortic insufficiency            | <i>ARHGEF4,</i><br><i>TFDP2, ASIC2,</i><br><i>STX18-AS1,</i><br><i>STX18, MSX1,</i><br><i>LEPREL1</i><br><i>(=P3H2), WDR7</i> |
| A4990 | f      | 54               | right atrium | AVR         | aortic stenosis                 |                                                                                                                               |
| A5569 | f      | 52               | right atrium | AVR         | aortic stenosis                 |                                                                                                                               |
| A5629 | m      | 71               | right atrium | AVR         | aortic stenosis                 |                                                                                                                               |
| A5666 | f      | 59               | right atrium | AVR         | aortic stenosis                 |                                                                                                                               |
| A5945 | m      | 52               | right atrium | AVR         | combined aortic vitium          |                                                                                                                               |
| A6115 | m      | 58               | right atrium | AVR         | aortic stenosis                 |                                                                                                                               |
| A6587 | m      | 25               | right atrium | AVR         | aortic insufficiency            |                                                                                                                               |
| A6603 | m      | 55               | right atrium | AVR         | aortic stenosis                 |                                                                                                                               |
|       | 7m/5f  | 54.5 (25 – 71)   |              |             |                                 |                                                                                                                               |

<sup>1</sup> at the time of operation, CABG: coronary artery bypass graft, AVR: aortic valve replacement

## Supplemental Table 9. Candidate gene knockout mouse models

| gene                                        | phenotype                                                                                                                                                                                  | reference                                                                                                        |
|---------------------------------------------|--------------------------------------------------------------------------------------------------------------------------------------------------------------------------------------------|------------------------------------------------------------------------------------------------------------------|
| <i>Macrod2</i>                              | increase in intestinal tumorigenicity,<br>no cardiac phenotype                                                                                                                             | Sakthianandeswaren et al., Cancer Disc., 8:988-1005 (2018); Lo Re et al., Front. Genet., 9:654 (2018)            |
| <i>Slc27a6</i><br><i>Arhgef4</i>            | --                                                                                                                                                                                         | Gerdin. Acta. Ophthalm., 88:925-927 (2010)                                                                       |
| <i>Gosr2</i>                                | atypical peripheral blood lymphocyte parameters (B cells ↓, granulocytes ↑)                                                                                                                | International Mouse Phenotyping Consortium                                                                       |
| <i>Asic2 (LOC107985038)</i>                 | homozygous: (male/female) preweaning lethality, complete penetrance,<br>heterozygous (male) abnormal gait<br>abnormal blood vessel physiology,<br>decreased vasoconstriction, hypertension | Gannon et al., Am. J. Physiol. Heart Circ. Physiol., 294:H1793-1803 (2008); Lu et al., Neuron, 64:885-897 (2009) |
| <i>Stx18-AS1</i><br><i>P3h2 (= Leprell)</i> | --                                                                                                                                                                                         | Pokidysheva et al., Proc. Natl. Acad. Sci. USA, 111:161-166 (2014)                                               |
| <i>Wdr7</i>                                 | abnormal thrombosis, embryonic lethality during organogenesis (complete penetrance), embryonic lethality (incomplete penetrance)                                                           | --                                                                                                               |

**Supplemental Table 10. Cross ethnical validation**

| rsid      | Lin et. al (2015) |    |      |                        | EU allele (+) |    | EU all  |        | EU septal defects |         |        | gene    | cytoband  |          |
|-----------|-------------------|----|------|------------------------|---------------|----|---------|--------|-------------------|---------|--------|---------|-----------|----------|
|           | ea                | oa | or   | <i>p</i>               | ea            | oa | beta    | se     | <i>p</i>          | beta    | se     |         |           | <i>p</i> |
| rs1400558 | A                 | G  | 1.15 | 1.63x10 <sup>-9</sup>  | t             | c  | 0.0096  | 0.0306 | 0.7547            | 0.0042  | 0.0515 | 0.9346  | EDNRA     | 4q31.22  |
| rs7863990 | T                 | C  | 1.34 | 3.71x10 <sup>-14</sup> | t             | c  | 0.0315  | 0.0333 | 0.3437            | 0.0028  | 0.0564 | 0.9608  | SMARCA2   | 9p24.2   |
| rs2433752 | G                 | A  | 0.83 | 1.04x10 <sup>-10</sup> | a             | g  | -0.0146 | 0.0448 | 0.7452            | 0.0188  | 0.0763 | 0.8055  | TBX3–TBX5 | 12q24.13 |
| rs490514  | G                 | A  | 1.19 | 1.20x10 <sup>-13</sup> | t             | c  | -0.0909 | 0.0422 | 0.03117           | -0.1478 | 0.0691 | 0.03248 | PTPRT     | 20q12    |

EU: DHM+UK meta-analysis, ea: effective allele, oa: other allele, or: odds ratio, *p*: *p* value, EU allele(+): eu allele in positive strand, beta: effective size, se: standard error

**Supplemental Table 11. Imputation score for all lead SNPs**

| <b>rsid</b> | <b>chr</b> | <b>pos_hg19</b> | <b>A1</b> | <b>A2</b> | <b>DHM</b> | <b>UK</b> |
|-------------|------------|-----------------|-----------|-----------|------------|-----------|
| rs35437121  | 2          | 131769448       | T         | C         | 0.854281   | 0.871797  |
| rs114503684 | 3          | 141834969       | G         | C         | 0.816128   | 0.859228  |
| rs2046060   | 3          | 187852486       | G         | A         | 0.938114   | 0.979392  |
| rs187369228 | 3          | 189802439       | G         | A         | 0.761438   | 0.789581  |
| rs870142    | 4          | 4648047         | T         | C         | 0.990797   | genotyped |
| rs185531658 | 5          | 113136521       | C         | T         | 0.826139   | 0.806271  |
| rs185531658 | 5          | 113136521       | C         | T         | 0.826139   | 0.806271  |
| rs146300195 | 5          | 128326845       | A         | G         | 0.794733   | 0.880439  |
| rs117527287 | 6          | 85729959        | A         | G         | 0.737518   | 0.824389  |
| rs148563140 | 8          | 81475406        | T         | C         | 0.862684   | 0.911681  |
| rs11065987  | 12         | 112072424       | G         | A         | genotyped  | genotyped |
| rs7982677   | 13         | 92988323        | A         | C         | 0.989636   | genotyped |
| rs138741144 | 17         | 32286564        | A         | G         | 0.785646   | 0.812021  |
| rs11874     | 17         | 45017193        | A         | G         | 0.990608   | 0.992829  |
| rs72917381  | 18         | 54546223        | T         | C         | 0.936111   | 0.949522  |
| rs150246290 | 20         | 15112880        | C         | G         | 0.823259   | 0.873741  |



**Supplemental Table 12. Genomic inflation**

|                                             | cases before<br>imputation | controls after<br>imputation | genomic inflation $\lambda$ |                  |
|---------------------------------------------|----------------------------|------------------------------|-----------------------------|------------------|
|                                             |                            |                              | before imputation           | after imputation |
| all CHD                                     | 1,495                      | 3,554                        | 1.032                       | 1.041            |
| septal defects                              | 445                        | 3,554                        | 1.023                       | 1.036            |
| ASD                                         | 232                        | 3,554                        | 1.014                       | 1.039            |
| right heart lesions                         | 270                        | 3,554                        | 1.017                       | 1.034            |
| left heart lesions                          | 138                        | 3,554                        | 1.011                       | 1.022            |
| transposition of the great<br>arteries      | 146                        | 3,554                        | 1.024                       | 1.032            |
| anomalies of thoracic<br>arteries and veins | 205                        | 3,554                        | 1.007                       | 1.028            |

**Supplemental Table 13. Power analysis**

|                             |     | Power with n cases and 8486 controls, MAF=0.05, prevalence=9/1000, genotyping error=0.001 |                       |                       |                       |                       |          |          |          |          |          |          |          |          |          |          |        |
|-----------------------------|-----|-------------------------------------------------------------------------------------------|-----------------------|-----------------------|-----------------------|-----------------------|----------|----------|----------|----------|----------|----------|----------|----------|----------|----------|--------|
|                             |     | OR                                                                                        | alpha                 | n=100                 | n=200                 | n=300                 | n=326    | n=399    | n=453    | n=486    | n=500    | n=1074   | n=1296   | n=1500   | n=3000   | n=4034   | n=5000 |
| suggestive<br>significance  | 1.2 | $1 \times 10^{-6}$                                                                        | $2.39 \times 10^{-5}$ | $2.07 \times 10^{-4}$ | $4.43 \times 10^{-4}$ | $7.53 \times 10^{-4}$ | 0.001243 | 0.001012 | 0.001751 | 0.001714 | 0.019214 | 0.031534 | 0.051429 | 0.265726 | 0.428973 | 0.553271 |        |
|                             | 1.5 | $1 \times 10^{-6}$                                                                        | $3.70 \times 10^{-3}$ | $2.67 \times 10^{-2}$ | $1.09 \times 10^{-1}$ | $1.55 \times 10^{-1}$ | 0.231282 | 0.309943 | 0.376382 | 0.399426 | 0.957304 | 0.986148 | 0.996780 |          | 1        | 1        | 1      |
|                             | 2.0 | $1 \times 10^{-6}$                                                                        | $1.59 \times 10^{-1}$ | $7.95 \times 10^{-1}$ | $9.69 \times 10^{-1}$ | $9.86 \times 10^{-1}$ | 0.997805 | 0.999608 | 0.999859 | 0.999934 |          | 1        | 1        | 1        | 1        | 1        | 1      |
|                             | 2.5 | $1 \times 10^{-6}$                                                                        | $8.03 \times 10^{-1}$ | $9.98 \times 10^{-1}$ | $9.99 \times 10^0$    | $9.99 \times 10^0$    |          | 1        | 1        | 1        | 1        | 1        | 1        | 1        | 1        | 1        | 1      |
|                             | 3.0 | $1 \times 10^{-6}$                                                                        | $9.90 \times 10^{-1}$ | $9.99 \times 10^0$    | $9.99 \times 10^0$    | $9.99 \times 10^0$    |          | 1        | 1        | 1        | 1        | 1        | 1        | 1        | 1        | 1        | 1      |
| genome-wide<br>significance | 1.2 | $5 \times 10^{-8}$                                                                        | $1.86 \times 10^{-6}$ | $2.15 \times 10^{-5}$ | $5.14 \times 10^{-5}$ | $9.46 \times 10^{-5}$ | 0.000169 | 0.000133 | 0.000251 | 0.000245 | 0.004270 | 0.007795 | 0.014232 | 0.117917 | 0.230057 | 0.335148 |        |
|                             | 1.5 | $5 \times 10^{-8}$                                                                        | $6.02 \times 10^{-4}$ | $6.37 \times 10^{-3}$ | $3.68 \times 10^{-2}$ | $5.78 \times 10^{-2}$ | 0.097780 | 0.145557 | 0.190877 | 0.207678 | 0.877087 | 0.949684 | 0.984798 | 0.999996 |          | 1        | 1      |
|                             | 2.0 | $5 \times 10^{-8}$                                                                        | $5.96 \times 10^{-2}$ | $6.04 \times 10^{-1}$ | $9.05 \times 10^{-1}$ | $9.50 \times 10^{-1}$ | 0.988961 | 0.997435 | 0.998934 | 0.999451 |          | 1        | 1        | 1        | 1        | 1        | 1      |
|                             | 2.5 | $5 \times 10^{-8}$                                                                        | $6.15 \times 10^{-1}$ | $9.91 \times 10^{-1}$ | $9.99 \times 10^0$    | $9.99 \times 10^0$    |          | 1        | 1        | 1        | 1        | 1        | 1        | 1        | 1        | 1        | 1      |
|                             | 3.0 | $5 \times 10^{-8}$                                                                        | $9.60 \times 10^{-1}$ | $9.99 \times 10^0$    | $9.99 \times 10^0$    | $9.99 \times 10^0$    |          | 1        | 1        | 1        | 1        | 1        | 1        | 1        | 1        | 1        | 1      |

**Supplemental Table 14. Primers used for qRT-PCR analyses and genotyping**

| primer                 | sequence                                     | length of amplicon |
|------------------------|----------------------------------------------|--------------------|
| hu MACROD2_F1100       | 5' CAG ATG GTG TCA ACA CTG TCA CT 3'         |                    |
| hu MACROD2_R1190       | 5' TTT TCA TCC TTT GCA AAA TCT TC 3'         | 91 bp              |
| hu GOSR2_F71           | 5' GGC GAC ATG GAT CCC CTG T 3'              |                    |
| hu GOSR2_R171          | 5' ATG TGC ACA GAC TGC TTG TCT 3'            | 101 bp             |
| hu WNT3_F1221          | 5' CCT GCA AGT AGG GCA CCA 3'                |                    |
| hu WNT3_R1333          | 5' TCT GAC GCT GAG GGC TGT 3'                | 108 bp             |
| hu ARHGEF4_F4853       | 5' CTG TAA GAA GGA CCT GCT CCG 3'            |                    |
| hu ARHGEF4_R4936       | 5' GTC TCT GTC CTT CCC GTC CT 3'             | 84 bp              |
| hu ASIC2_F1032         | 5' AGC CAC CTT TCA TCC AAG AG 3'             |                    |
| hu ASIC2_R1126         | 5' TGG GGG CAG GTA TGT GAG 3'                | 95 bp              |
| hu MSX1_F661           | 5' GAC CCC GTG GAT GCA GAG 3'                |                    |
| hu MSX1_R752           | 5' GGT TCG TCT TGT GTT TGC GG 3'             | 92 bp              |
| hu P3H2_F1278          | 5' GCC TCT CTC CCA TCG AGA AT 3'             |                    |
| hu P3H2_R1366          | 5' CAG GGC TTT CAC ATA CTC ACC 3'            | 89 bp              |
| hu SLC27A6_F1446       | 5' TTA CAT TTT TAC CTC TGG AAC AAC A 3'      |                    |
| hu SLC27A6_R1555       | 5' CAT GAG CAG TAC AAC CAA AAG C 3'          | 110 bp             |
| hu STX18_F986          | 5' TCA AGG AAG GCA ACG AAG AC 3'             |                    |
| hu STX18_R1080         | 5' GGA GAA GGA GCA CAT CAC G 3'              | 94 bp              |
| hu STX18-AS1_F455      | 5' GCC ATC CCT AAG ACA GCA AG 3'             |                    |
| hu STX18-AS1_R540      | 5' GCT TAG ACT CTC TGA ATC TCT GCA T 3'      | 86 bp              |
| hu TFDP2_F960          | 5' GCT GGT GTC AGA GTT CAC CA 3'             |                    |
| hu TFDP2_R1041         | 5' TCT TCG CCT AAT GTT CTT CTG A 3'          | 82 bp              |
| hu WDR7_F1913          | 5' TGG AGG CCT TCT GAT GAT TAC 3'            |                    |
| hu WDR7_R2006          | 5' TCA CAC AAC GAT CCA ATG C 3'              | 94 bp              |
| hu OCT4_F268           | 5' GGG ATG GCG TAC TGT GGG 3'                |                    |
| hu OCT4_R416           | 5' GCA CCA GGG GTG ACG GTG 3'                | 149 bp             |
| hu KLF4_F1441          | 5' TCT TCG TGC ACC CAC TTG GG 3'             |                    |
| hu KLF4_R1574          | 5' CTG CTC AGC ACT TCC TCA AG 3'             | 134 bp             |
| hu SOX2_F840           | 5' ACA GCT ACG CGC ACA TGA 3'                |                    |
| hu SOX2_R908           | 5' GGT AGC CCA GCT GCT CCT 3'                | 69 bp              |
| hu CMYC_F1311          | 5' CAC CAG CAG CGA CTC TGA 3'                |                    |
| hu CMYC_R1412          | 5' GAT CCA GAC TCT GAC CTT TTG C 3'          | 102 bp             |
| hu NANOG_F253          | 5' TGC TTT GAA GCA TCC GAC TGT 3'            |                    |
| hu NANOG_R446          | 5' GGT TGT TTG CCT TTG GGA CTG 3'            | 194 bp             |
| hu REX1_F292           | 5' AGT AGT GCT CAC AGT CCA GCA G 3'          |                    |
| hu REX1_R397           | 5' TGT GCC CTT CTT GAA GGT TT 3'             | 106 bp             |
| mu Gosr2_F217          | 5' TGG AGA TTT TGT CAA GCA AGG A             |                    |
| mu Gosr2_R306          | 5' GCA AGT GCT GGA CAT CAT ACT               | 90 bp              |
| mu MacroD2_F264        | 5' AAA AGG TGT GGA GAG AGG AGA A             |                    |
| mu MacroD2_R371        | 5' TCC ATG ATA GAA TGG TGC TCA               | 108 bp             |
| mu Msx1_F659           | 5' GCC CCG AGA AAC TAG ATC G 3'              |                    |
| mu Msx1_R767           | 5' TTG GTC TTG TGC TTG CGT AG 3'             | 109 bp             |
| mu Wnt3_F107           | 5' CTG CTC GGG CTG CTA CTC                   |                    |
| mu Wnt3_R211           | 5' GGC CAG AGA TGT GTA CTG CTG               | 105 bp             |
| SeV_F                  | 5' GGA TCA CTA GGT GAT ATC GAG C 3'          |                    |
| SeV_R                  | 5' ACC AGA CAA GAG TTT AAG AGA TAT GTA TC 3' | 181 bp             |
| hu $\beta$ -actin_F382 | 5' CCA ACC GCG AGA AGA TGA 3'                |                    |
| hu $\beta$ -actin_R478 | 5' CCA GAG GCG TAC AGG GAT AG 3'             | 97 bp              |
| MACROD2_SNP280_F       | 5' ACA AGG AAC CAC TAA ACA GCT T 3'          |                    |
| MACROD2_SNP280_R2      | 5' GAG CTA TTT CAA TTA TGT TAC TC 3'         | 340 bp             |
| MACROD2_SNP290_F       | 5' AGT GAA CAA TAA GGT AAA CAG TTA 3'        |                    |
| MACROD2-SNP290_R2      | 5' ATC CAT CCA ACC AAC TGG CTA 3'            | 409 bp             |
| MACROD2_SNP721_F       | 5' TGT GTG GTT ATG ACA TTT GTC C 3'          |                    |
| MACROD2_SNP721_R       | 5' CTG TTC AAT TTG CCC CTG CTA 3'            | 500 bp             |
| MACROD2_SNP733_F       | 5' TGA GTG AGT CTC CTG TAA GCA 3'            |                    |
| MACROD2_SNP733_R       | 5' CAA CAA TAT GAC TTG CAG GTG T 3'          | 393 bp             |
| GOSR2_SNP363_F         | 5' GGT GTC TCA CAG CCT GAC TA 3'             |                    |
| GOSR2_SNP363_R         | 5' ATG CTA TTC ACT CAG CCT TGT A 3'          | 467 bp             |

| <b>primer</b>    | <b>sequence</b>                     | <b>length of amplicon</b> |
|------------------|-------------------------------------|---------------------------|
| GOSR2_SNP446_F   | 5' CTA CCT GAG ACT GGA ACA TCA 3'   |                           |
| GOSR2_SNP446_R   | 5' CGA GAT CGG CTT CCG CTT C 3'     | 365 bp                    |
| GOSR2_SNP874_F   | 5' CCA GTG TGG GCA GAT CCC A 3'     |                           |
| GOSR2_SNP874_R   | 5' ACA AGA AAC TAA CAG AGC AGG 3'   | 371 bp                    |
| rs185531658_GT_F | 5' TTG TCG GTG GCA CCA TGT TAA 3'   |                           |
| rs185531658_GT_R | 5' AAA CGA GGA GAG TTG TAG CAC 3'   | 307 bp                    |
| rs117527287_GT_F | 5' ATA TAT GCT GCC AAA CAA GTG G 3' |                           |
| rs117527287_GT_R | 5' TCA CCA CAG GCA ACC TAG GT 3'    | 335 bp                    |

**Supplemental Figure 1. Validation of rs185531658 and rs117527287 by Sanger sequencing**

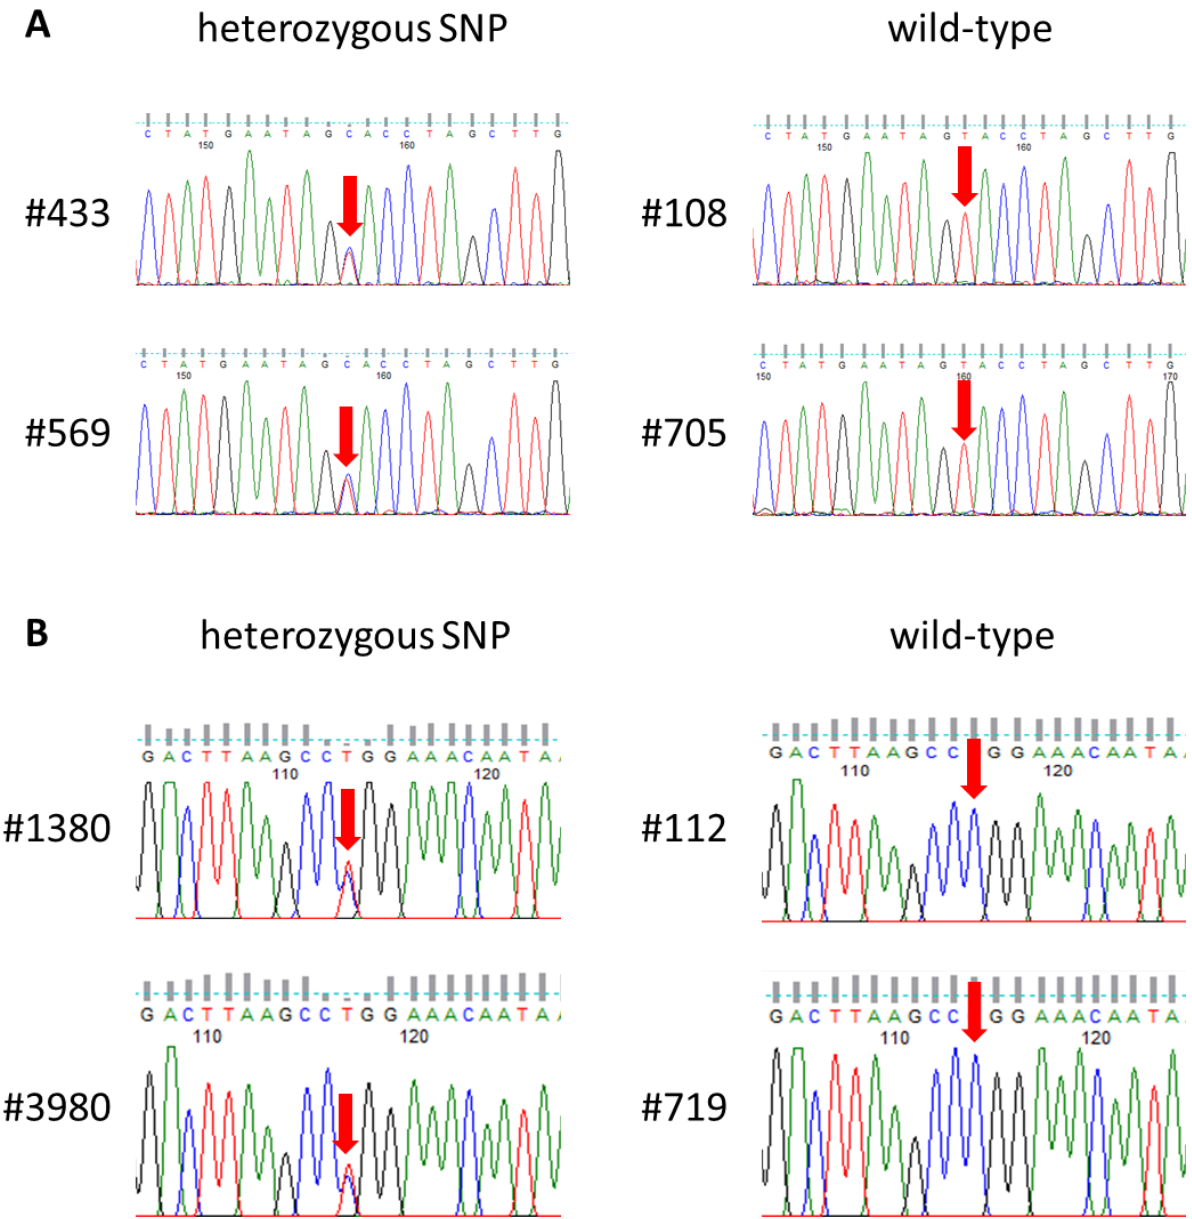

Representative chromatograms of two patients heterozygous for rs185531658 (A) or rs117527287 (B) and appropriate control patients with wild-type sequence are shown.

## Supplemental Figure 2. SNPs associated with right heart lesions

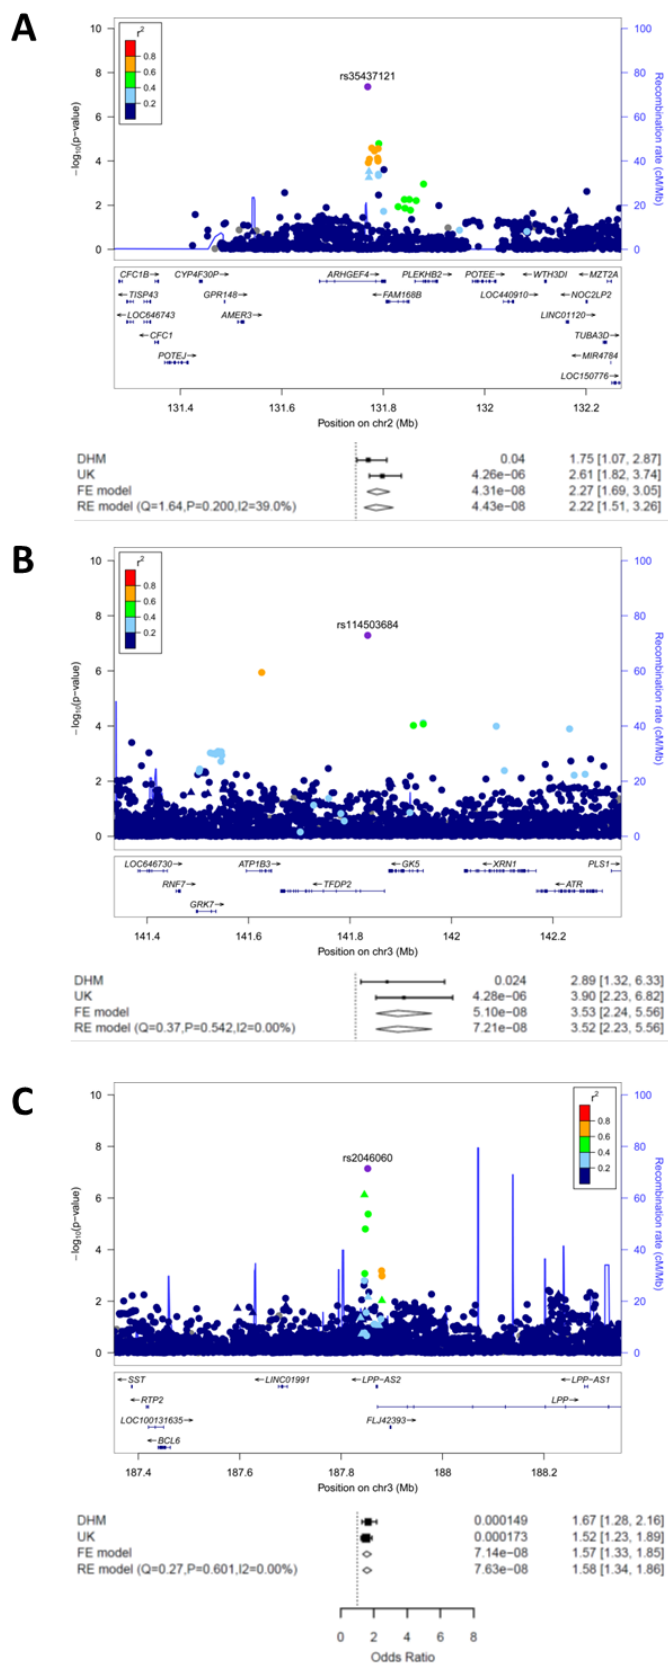

**A:** LocusZoom plot of the genomic region of rs11065987 on chromosome 12. **B:** LocusZoom plot of the genomic region of rs7982677 on chromosome 13. **C:** LocusZoom plot of the *SLC27A6* region on chromosome 5. The index SNP is indicated as purple diamonds and the other SNPs are color coded depending on their degree of correlation ( $r^2$ ). Circles represent imputed SNPs, triangles genotyped SNPs. FE: fixed effects, RE: random effects. Patients with right heart lesions,  $n=1,296$ .  $-\log_{10} p$  values were determined by association statistics from the GWAS (logistic regression).

### Supplemental Figure 3. SNPs associated with left heart lesions

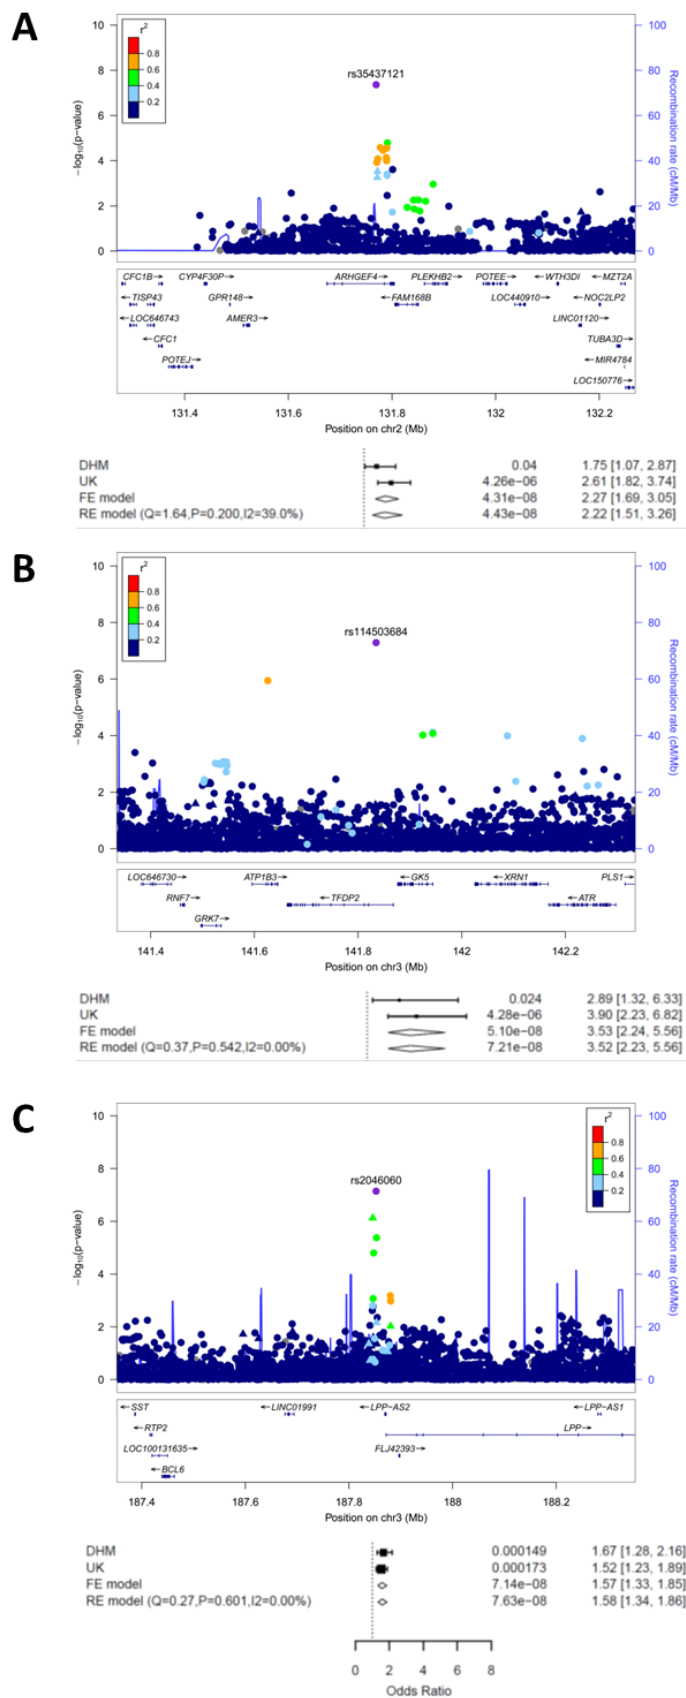

**A:** LocusZoom plot of the *ARHGEF4* region on chromosome 2. **B:** LocusZoom plot of the *TFDP2* region on chromosome 3. **C:** LocusZoom plot of the *FLJ42993* region on chromosome 3. The index SNPs are indicated as purple diamonds and the other SNPs are color coded depending on their degree of correlation ( $r^2$ ). Circles represent imputed SNPs, triangles genotyped SNPs. FE: fixed effects, RE: random effects. Patients with left heart lesions,  $n=326$ .  $-\log_{10} p$  values were determined by association statistics from the GWAS (logistic regression).

## Supplemental Figure 4. SNPs associated with septal defects

**A**

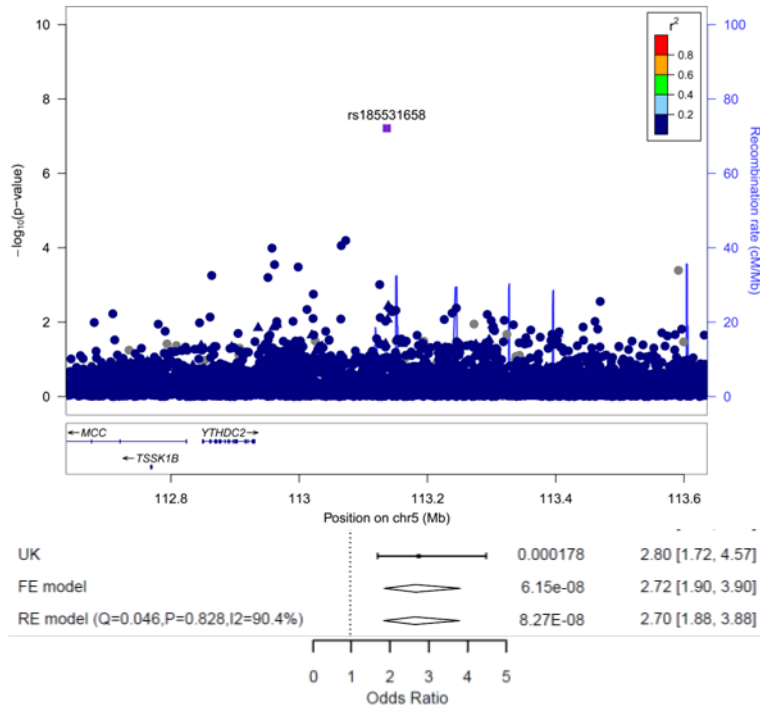

**B**

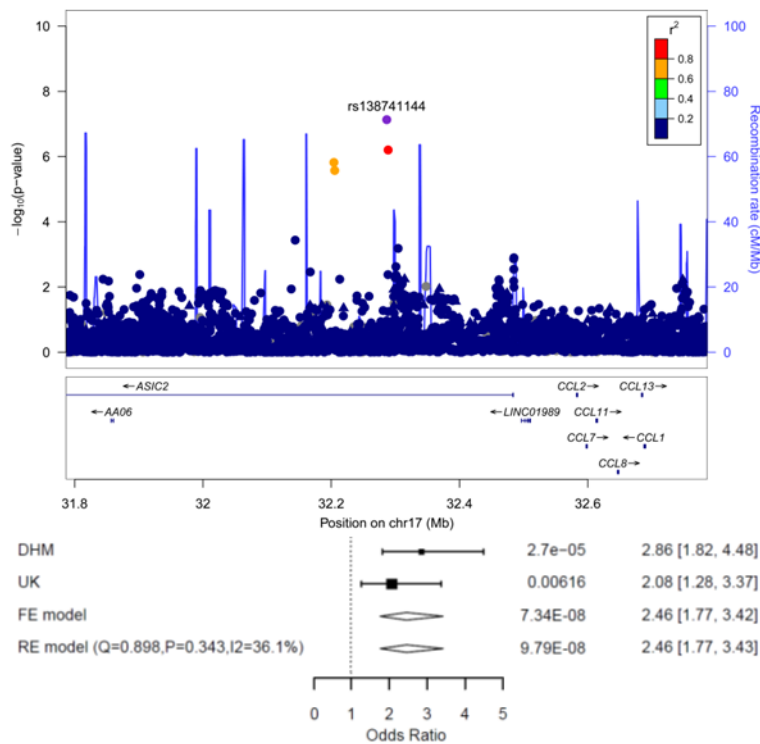

**A:** LocusZoom plot of the region on chromosome 5. **B:** LocusZoom plot of the region on chromosome 17. The index SNP is indicated as purple diamonds and the other SNPs are color coded depending on their degree of correlation ( $r^2$ ). Circles represent imputed SNPs, triangles genotyped SNPs. FE: fixed effects, RE: random effects. Patients with septal defects,  $n=1,074$ .  $-\log_{10} p$  values were determined by association statistics from the GWAS (logistic regression).



## Supplemental Figure 5. SNPs associated with ASD

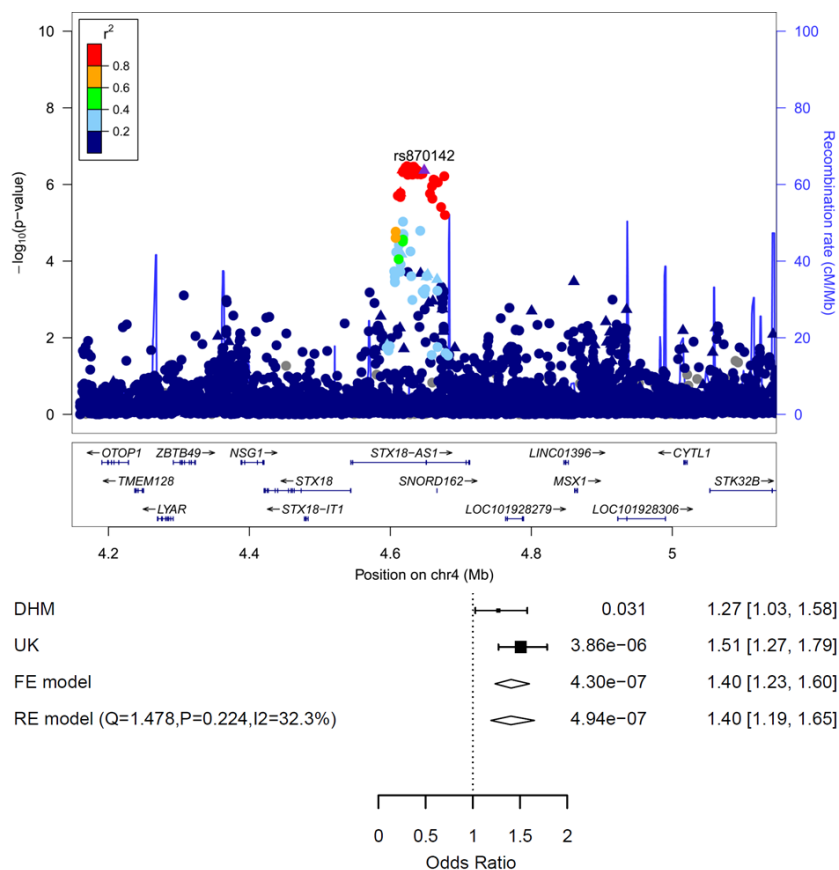

LocusZoom plot of the *SNORD162* region on chromosome 4. The index SNP is indicated as purple diamonds and the other SNPs are color coded depending on their degree of correlation ( $r^2$ ). Circles represent imputed SNPs, triangles genotyped SNPs. FE: fixed effects, RE: random effects. ASD patients,  $n=572$ .  $-\log_{10} p$  values were determined by association statistics from the GWAS (logistic regression).

## Supplemental Figure 6. SNPs associated with ASDII

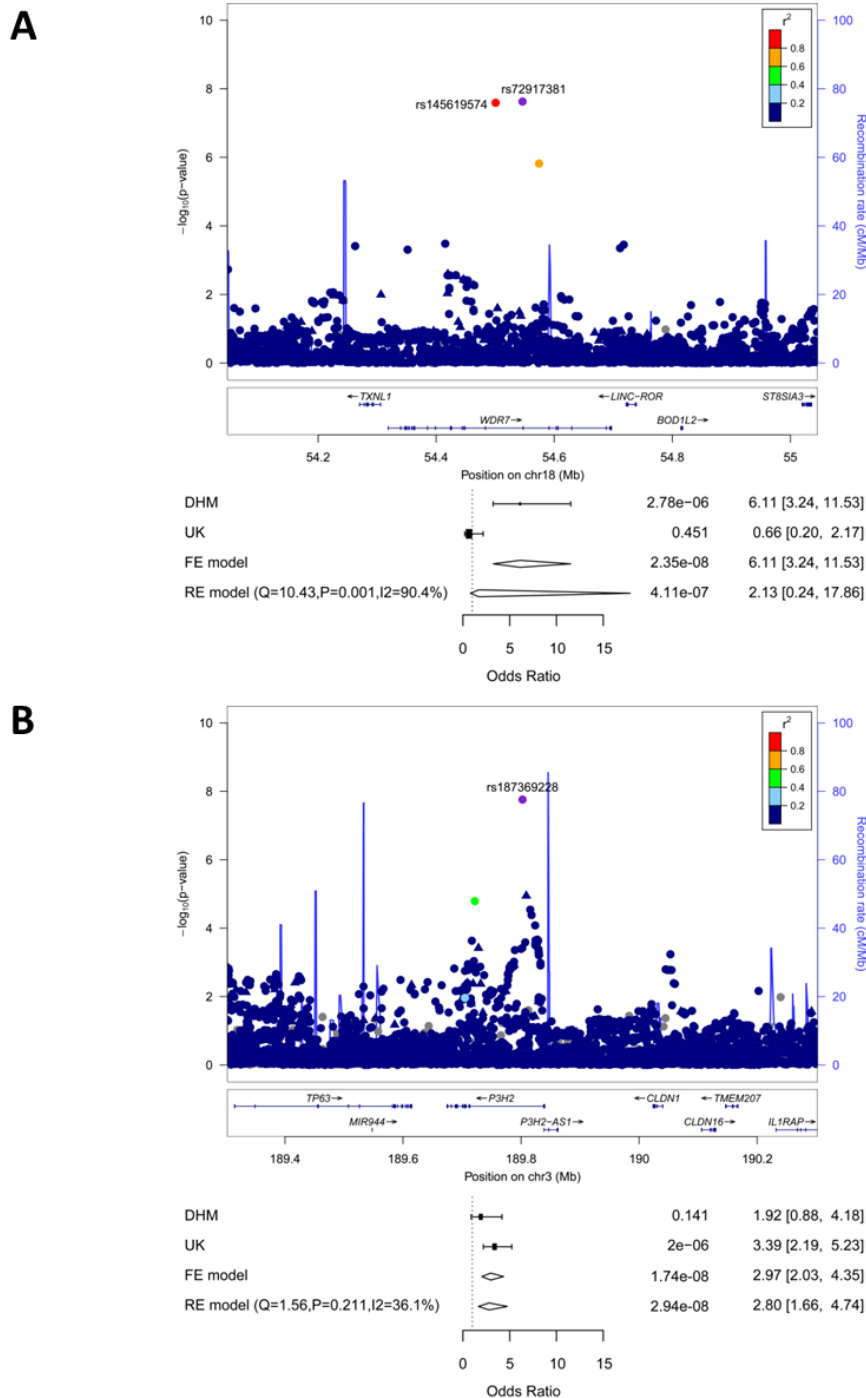

**A:** LocusZoom plot of the *WDR7* region on chromosome 18. **B:** LocusZoom plot of the *P3H2* (= *LEPRELI*) region on chromosome 3. The index SNPs are indicated as purple diamonds and the other SNPs are color coded depending on their degree of correlation ( $r^2$ ). Circles represent imputed SNPs, triangles genotyped SNPs. FE: fixed effects, RE: random effects. ASDII patients,  $n=489$ .  $-\log_{10} p$  values were determined by association statistics from the GWAS (logistic regression).

## Supplemental Figure 7. SNPs associated with anomalies of thoracic arteries and veins

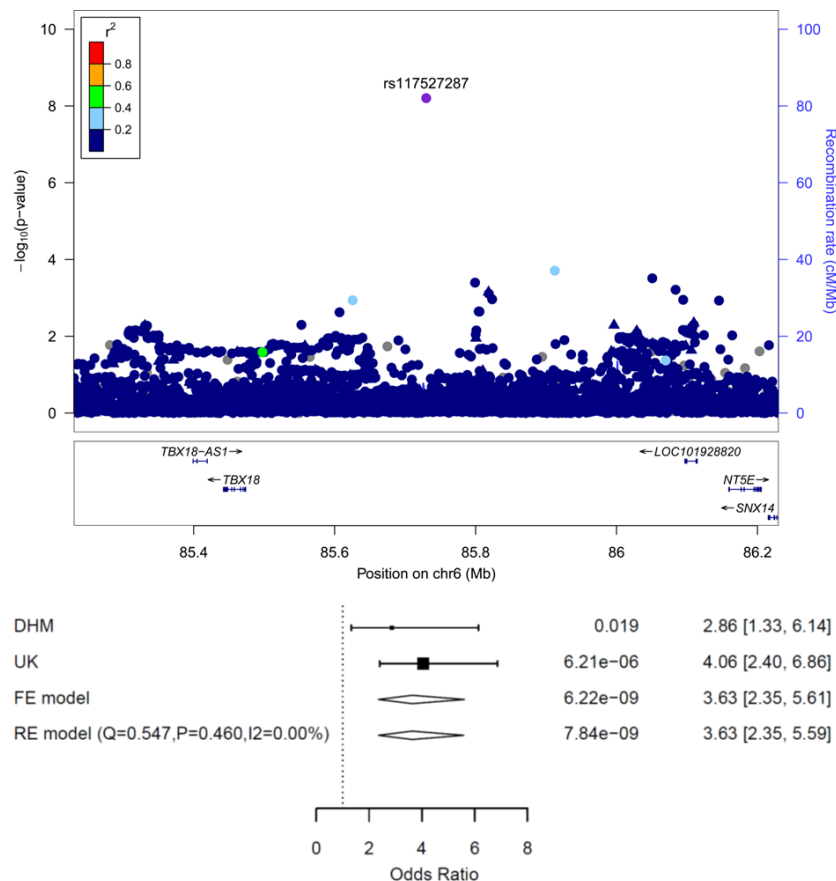

LocusZoom plot of the region on chromosome 6. The index SNP is indicated as purple diamonds and the other SNPs are color coded depending on their degree of correlation ( $r^2$ ). Circles represent imputed SNPs, triangles genotyped SNPs. FE: fixed effects, RE: random effects. ATAV patients,  $n=486$ .  $-\log_{10} p$  values were determined by association statistics from the GWAS (logistic regression).

## Supplemental Figure 8. Participation of CHD-associated SNP-carrying genes in signaling cascades

| Entrez Gene Id | Gene Symbol | GO_CELL_SIGNALING | GO_EMBRYONIC_ORGAN_DEVELOPMENT | GO_REPRODUCTIVE_SYSTEM_DEVELOPMENT | GO_ANATOMICAL_STRUCTURE_FORMATION_INVOLVED_IN_MORPHOGENESIS | GO_EMBRYONIC_MORPHOGENESIS | GO_MALE_SEX_DIFFERENTIATION | GO_REGULATION_OF_CYTOKINE_PRODUCTION | GO_EYE_DEVELOPMENT | GO_EMBRYO_DEVELOPMENT | GO_DEVELOPMENTAL_PROCESS_INVOLVED_IN_REPRODUCTION | Entrez Source | Gene Description                                       |
|----------------|-------------|-------------------|--------------------------------|------------------------------------|-------------------------------------------------------------|----------------------------|-----------------------------|--------------------------------------|--------------------|-----------------------|---------------------------------------------------|---------------|--------------------------------------------------------|
| 2625           | GATA3       |                   |                                |                                    |                                                             |                            |                             |                                      |                    |                       |                                                   | S             | GATA binding protein 3                                 |
| 2626           | GATA4       |                   |                                |                                    |                                                             |                            |                             |                                      |                    |                       |                                                   | S             | GATA binding protein 4                                 |
| 7484           | WNT9B       |                   |                                |                                    |                                                             |                            |                             |                                      |                    |                       |                                                   | S             | wingless-type MMTV integration site family, member 9B  |
| 3624           | INHBA       |                   |                                |                                    |                                                             |                            |                             |                                      |                    |                       |                                                   | S             | inhibin, beta A                                        |
| 2554           | GABRA1      |                   |                                |                                    |                                                             |                            |                             |                                      |                    |                       |                                                   | S             | gamma-aminobutyric acid (GABA) A receptor, alpha 1     |
| 1740           | DLG2        |                   |                                |                                    |                                                             |                            |                             |                                      |                    |                       |                                                   | S             | discs, large homolog 2 (Drosophila)                    |
| 2914           | GRM4        |                   |                                |                                    |                                                             |                            |                             |                                      |                    |                       |                                                   | S             | glutamate receptor, metabotropic 4                     |
| 2559           | GABRA6      |                   |                                |                                    |                                                             |                            |                             |                                      |                    |                       |                                                   | S             | gamma-aminobutyric acid (GABA) A receptor, alpha 6     |
| 9394           | HS6ST1      |                   |                                |                                    |                                                             |                            |                             |                                      |                    |                       |                                                   | S             | heparan sulfate 6-O-sulfotransferase 1                 |
| 26146          | TRAF3IP1    |                   |                                |                                    |                                                             |                            |                             |                                      |                    |                       |                                                   | S             | TNF receptor-associated factor 3 interacting protein 1 |
| 2201           | FBN2        |                   |                                |                                    |                                                             |                            |                             |                                      |                    |                       |                                                   | S             | fibrillin 2                                            |
| 1508           | CTSB        |                   |                                |                                    |                                                             |                            |                             |                                      |                    |                       |                                                   | S             | cathepsin B                                            |
| 2324           | FLT4        |                   |                                |                                    |                                                             |                            |                             |                                      |                    |                       |                                                   | S             | fms-related tyrosine kinase 4                          |
| 9698           | PUM1        |                   |                                |                                    |                                                             |                            |                             |                                      |                    |                       |                                                   | S             | pumilio homolog 1 (Drosophila)                         |

**Supplemental Figure 9. Network-based functional enrichment analysis of pathways involved in cardiac development**

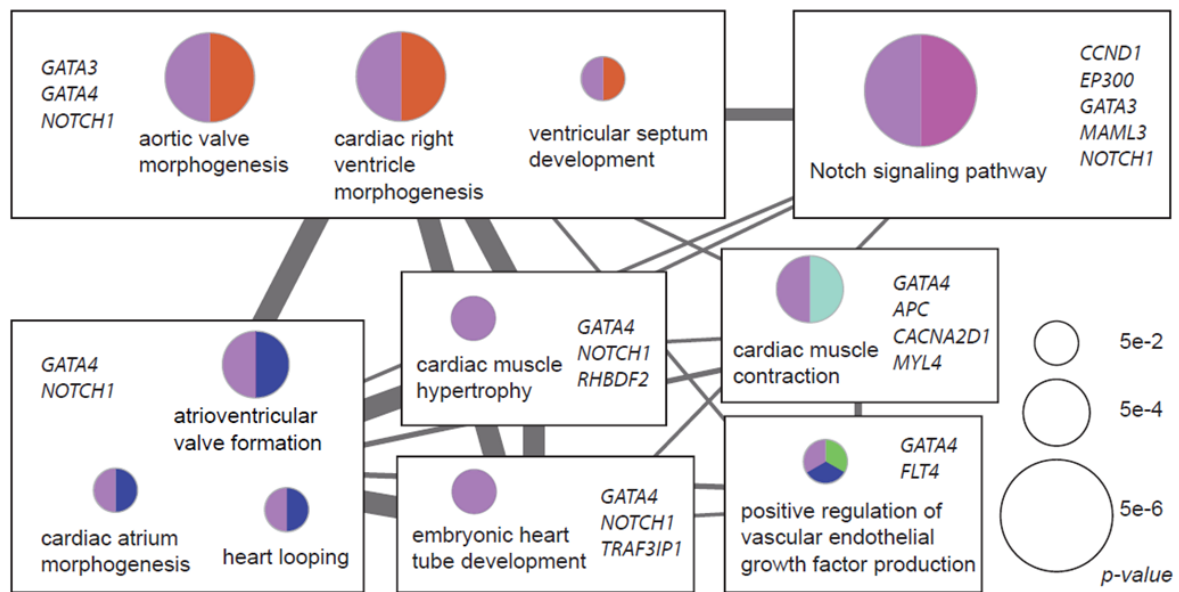

Significantly enriched gene sets by ClueGO (Bonferroni-corrected  $p$  values  $< 0.1$ ). Each circle represents a pathway/GO-term with each type of pie chart (identified by color and pattern) represents a functional group. The size of the circles represents raw  $p$  values of enrichment tests for GO terms. The width of the edges represents the degree of similarity between GO terms. Rectangles encompass the GO terms that share the same significant genes.  $p$  values were calculated with the unpaired two-tailed Student's  $t$  test or the Mann-Whitney Rank Sum test.

**Supplemental Figure 10. Identification and reclustering of mesodermal and neural crest cells of the murine cardiogenic region**

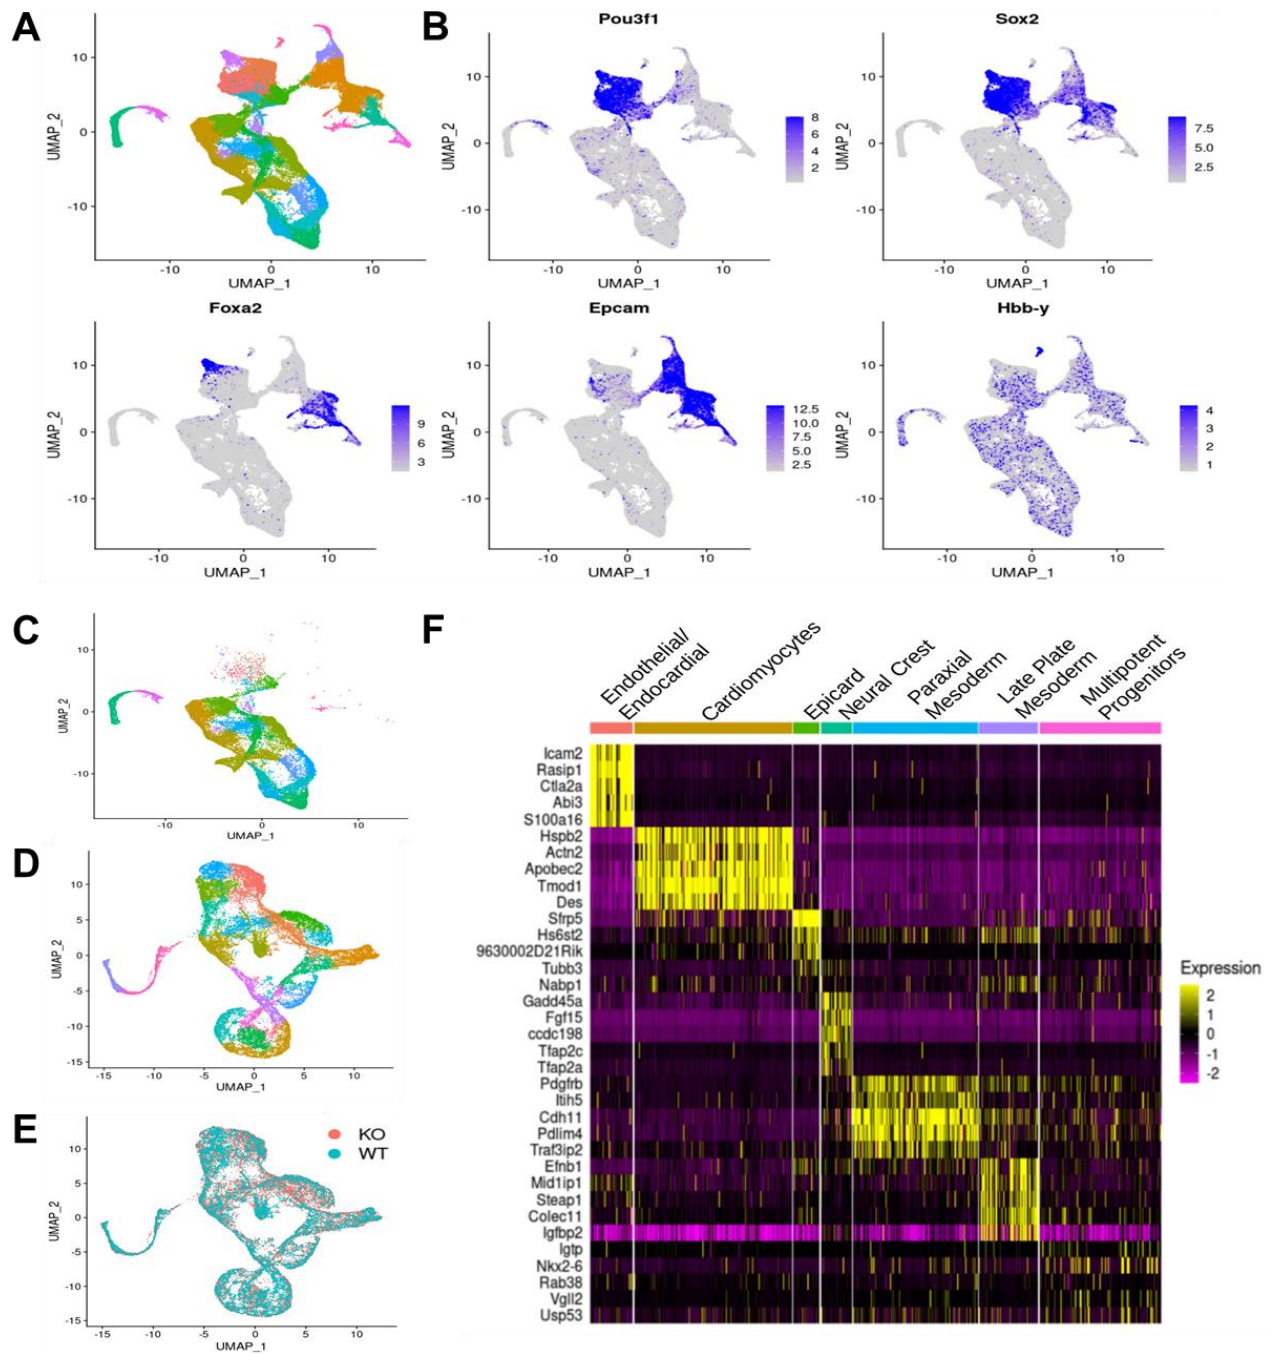

**A:** UMAP plot showing clusters of all captured cell populations ( $n=56,743$ ). **B:** Expression of *Pou3f1*, *Sox2* (ectodermal marker genes), *Foxa2*, *Epcam* (endodermal marker genes) and *Hbb-y* (blood cells). **C:** UMAP plot of all mesodermal cells after exclusion of ecto- and endodermal cells ( $n=21,745$ ). **D:** UMAP plot of reclustered mesodermal cells. **E:** Comparison of clustering of mesodermal cells from wild-type and *Hand2*-null embryos. **F:** Gene expression heatmap of the identified populations in Figure 5A.

**Supplemental Figure 11. Expression of candidate genes during cardiac differentiation of human iPS cells**

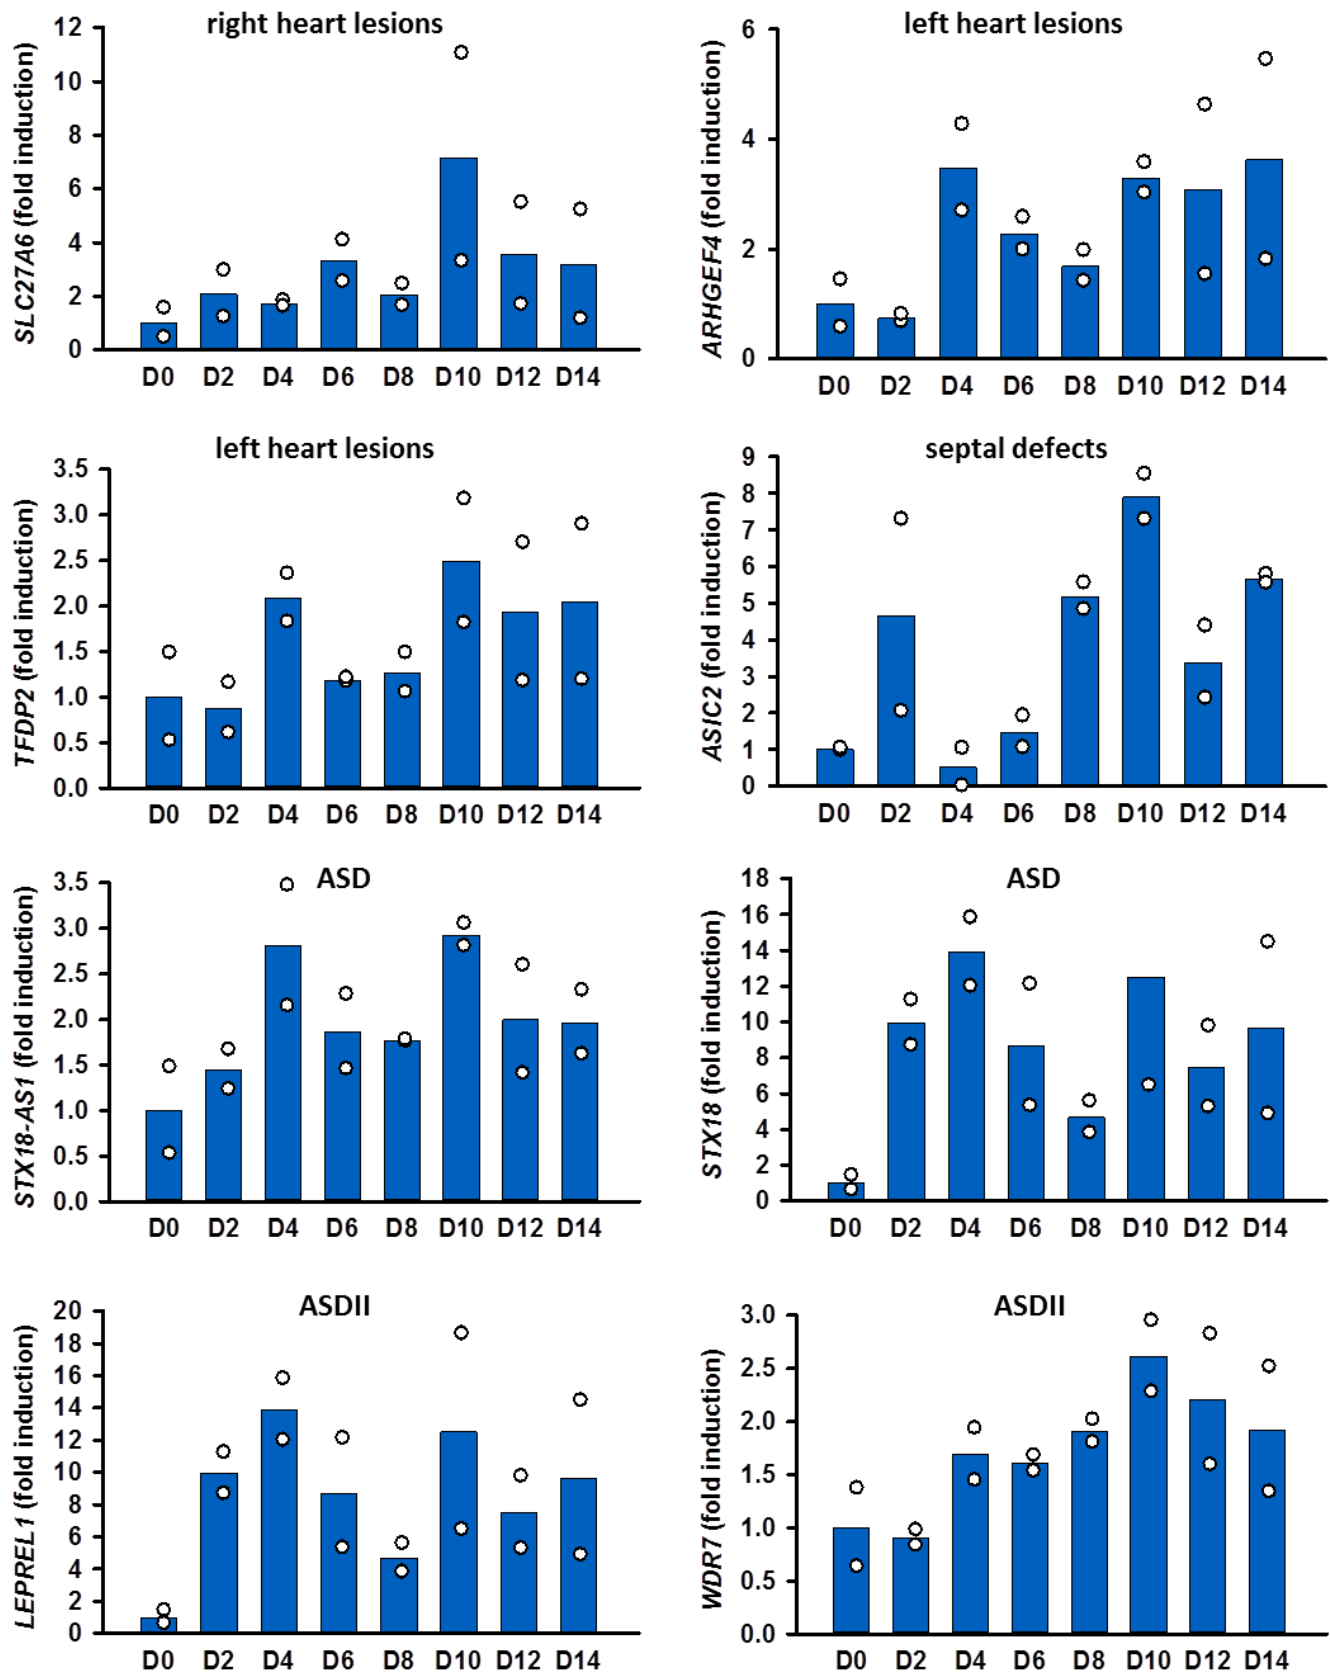

Expression of candidate genes during directed cardiac differentiation of human iPS cells.

Supplemental Figure 12. Expression of *MACROD2*, *GOSR2* and *WNT3* in patient tissue with or without risk variant

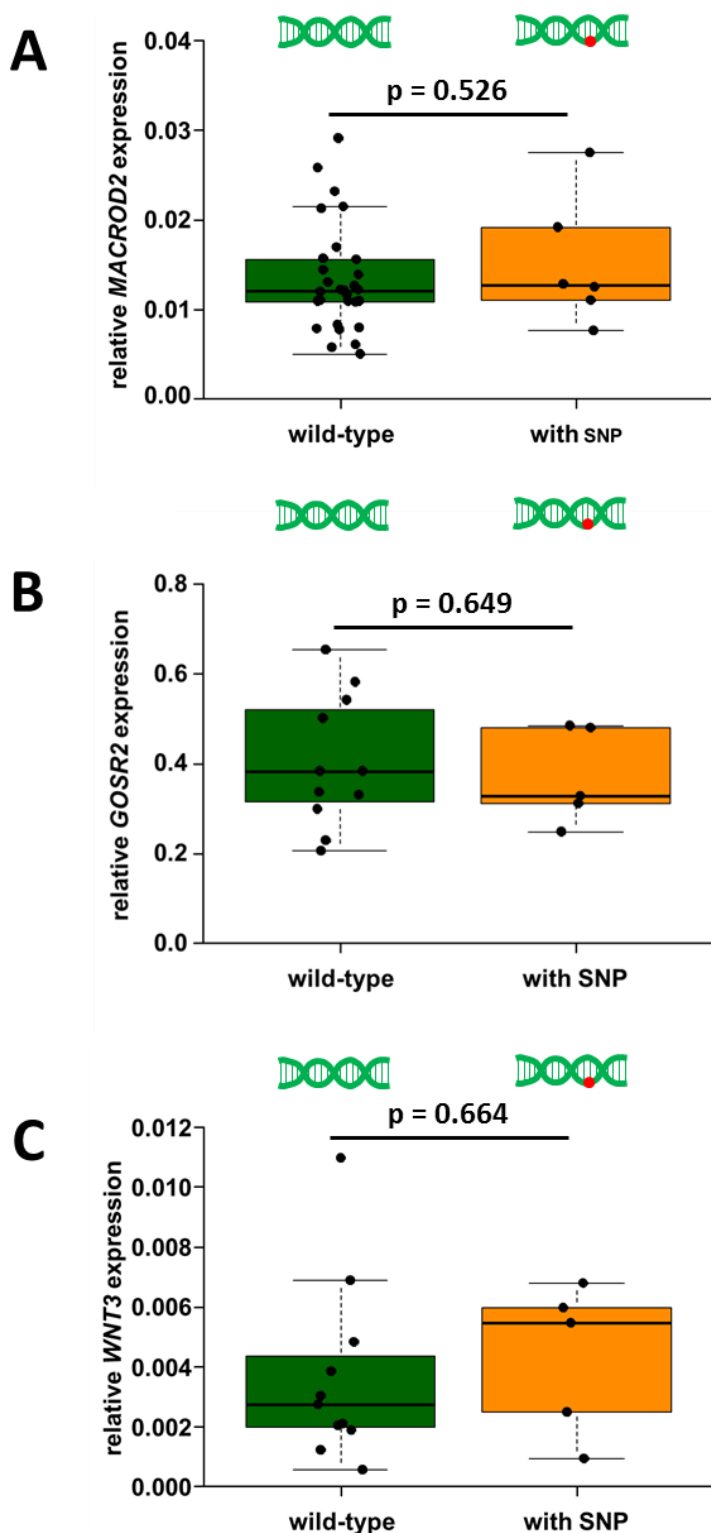

**A:** Expression of *MACROD2* in aortic tissue of pediatric TGA patients with wild-type ( $n=29$ ) or heterozygous SNP genotype ( $n=6$ ). **B:** Expression of *GOSR2* in tissue of pediatric patients with anomalies of thoracic arteries and veins with wild-type ( $n=11$ ) or heterozygous SNP genotype ( $n=5$ ). **C:** Expression of *WNT3* in tissue of pediatric patients with anomalies of thoracic arteries and veins with wild-type ( $n=11$ ) or heterozygous SNP genotype ( $n=5$ ).  $p$  values were calculated with the unpaired two-tailed Student's  $t$  test or the Mann-Whitney Rank Sum test.



**Supplemental Figure 13. Expression of candidate genes in pediatric and adult aortic tissue**

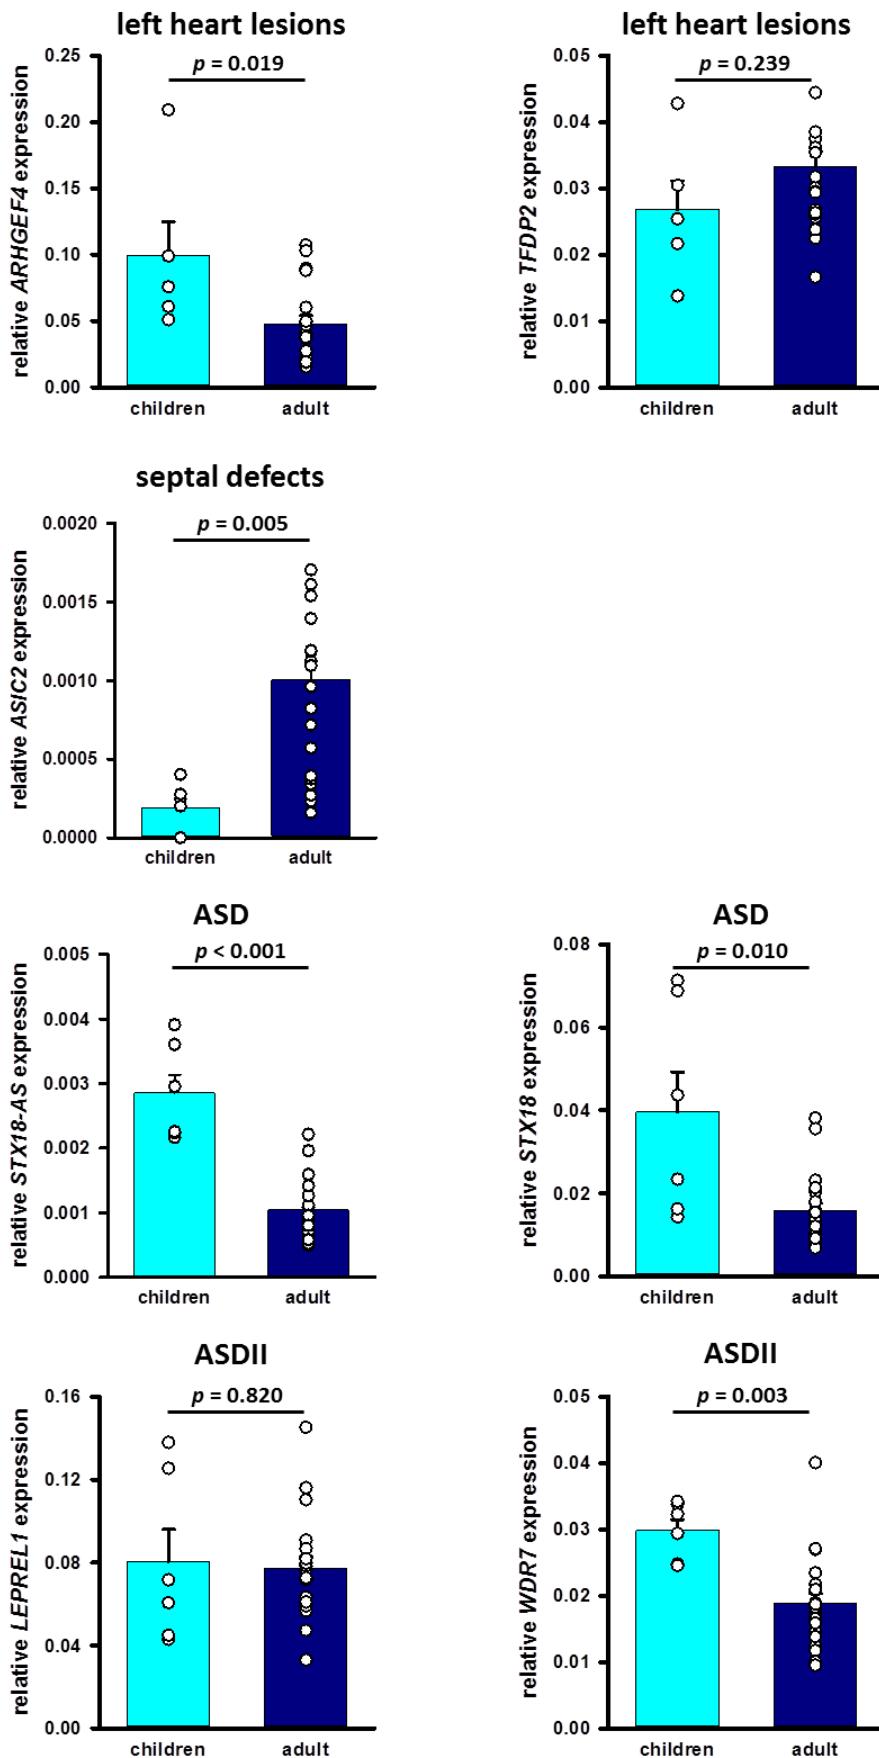

Expression of candidate genes in aortic tissue of CHD patients with left heart lesions ( $n=5$ ), septal defects ( $n=6$ ), ASD ( $n=6$ ), ASDII ( $n=6$ ) and adult surgical patients ( $n=20$ ).  $p$  values were calculated with the unpaired two-tailed Student's  $t$  test or the Mann-Whitney Rank Sum test.

**Supplemental Figure 14. Expression of candidate genes in pediatric and adult atrial tissue**

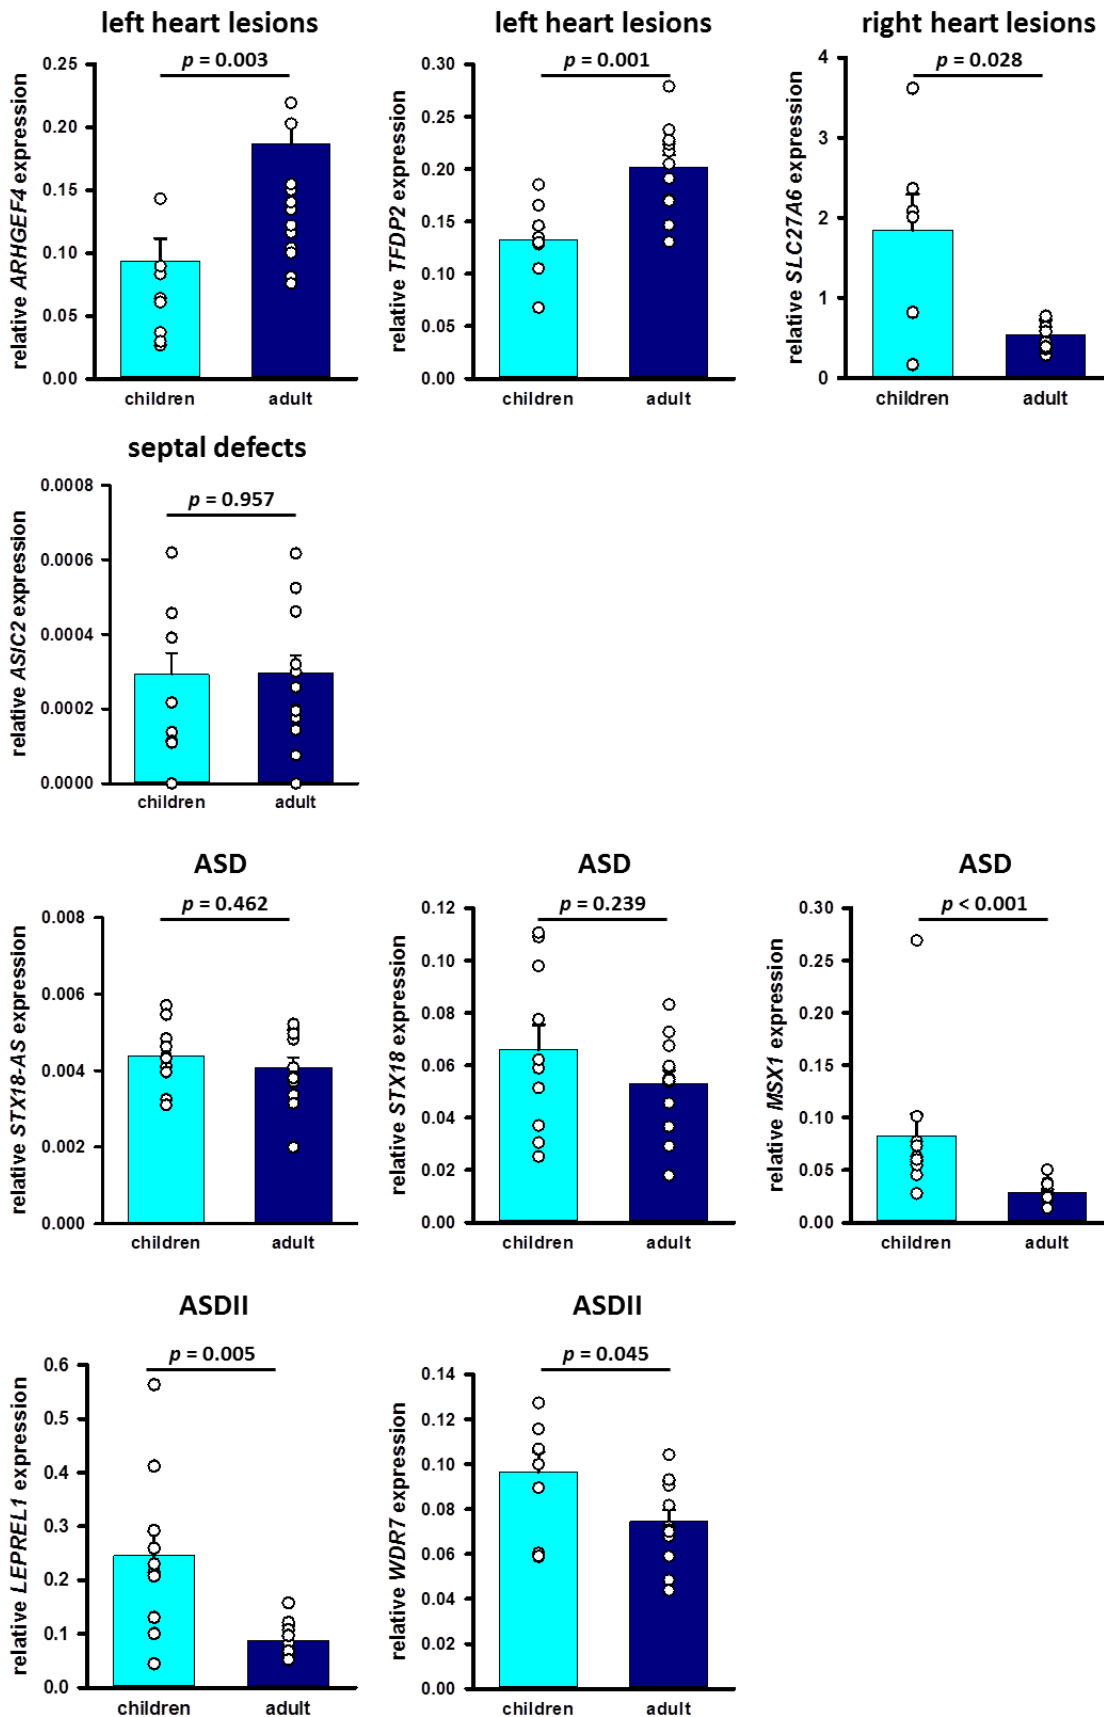

Expression of candidate genes in atrial tissue of CHD patients with left heart lesions ( $n=8$ ), right heart lesions ( $n=6$ ), septal defects ( $n=10$ ), ASD ( $n=10$ ), ASDII ( $n=10$ ) and adult surgical patients ( $n=12$ ).  $p$  values were calculated with the unpaired two tailed Student's  $t$  test or the Mann-Whitney Rank Sum test.

**Supplemental Figure 15. Identification of different cell types after single-cell RNAseq by expression of defined marker genes**

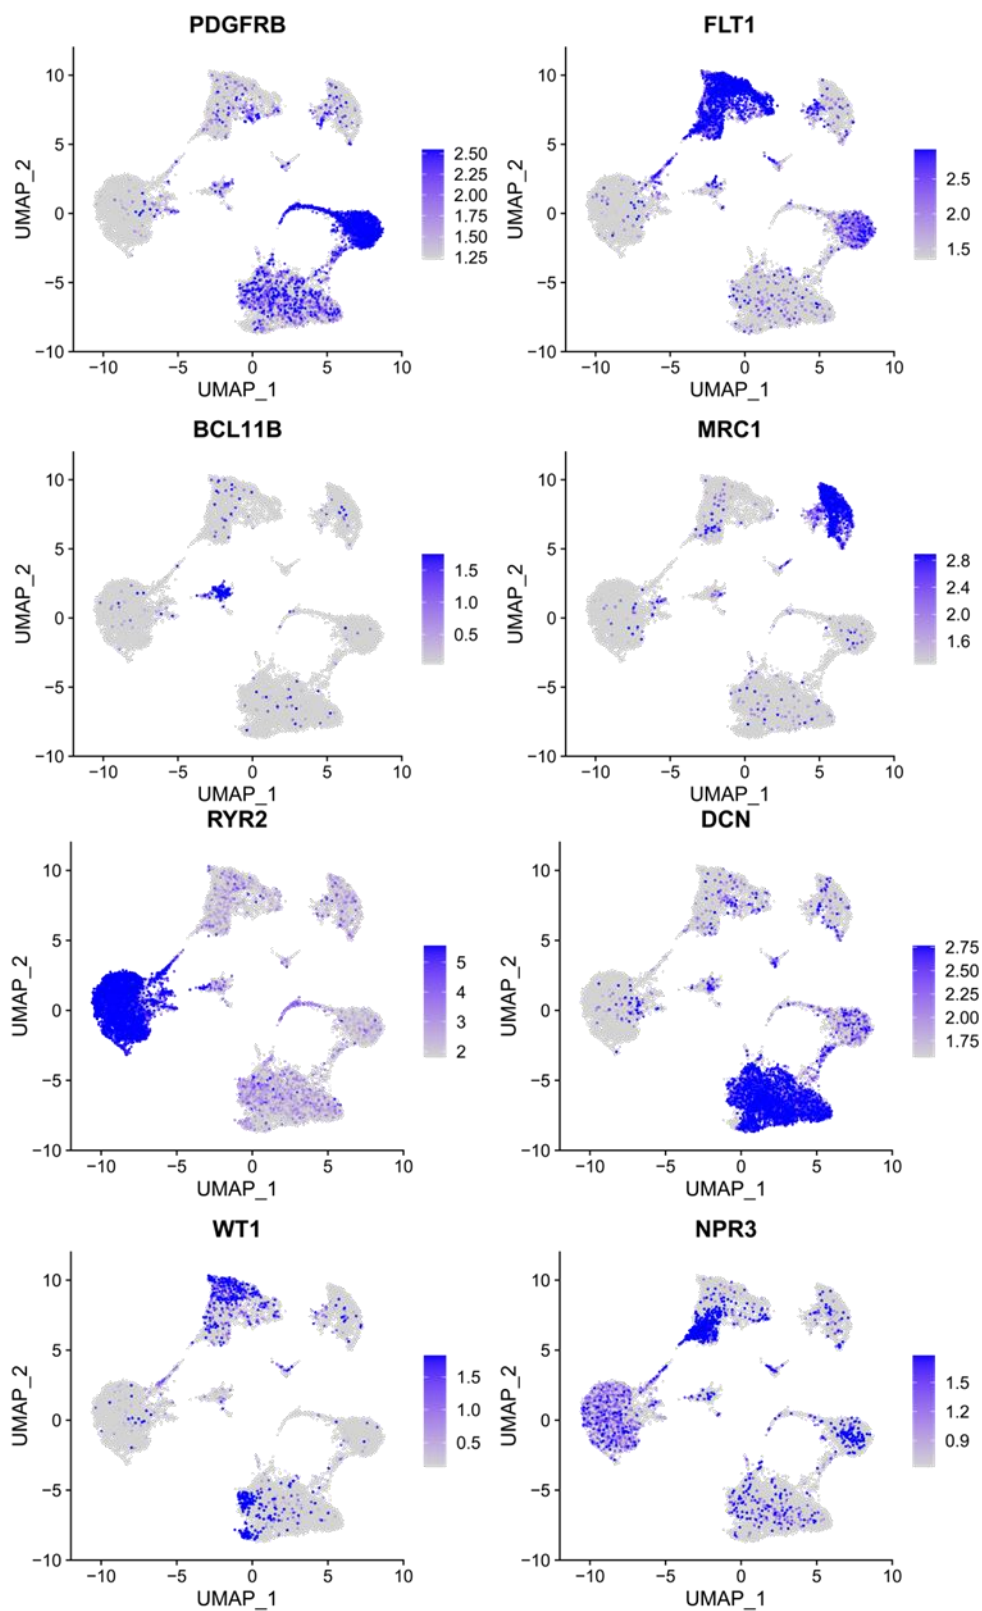

*PDGFRB* (platelet-derived growth factor receptor  $\beta$ ), *FLT1* (fms related receptor kinase 1), *BCL11B* (BAF chromatin remodeling complex subunit BCL11B), *MRC1* (mannose receptor C-type 1), *RYR2* (ryanodine receptor 2), *DCN* (decorin), *WT1* (WT1 transcription factor), *NPR3* (natriuretic peptide receptor 3).

**Supplemental Figure 16. Workflow for general GWAS quality control**

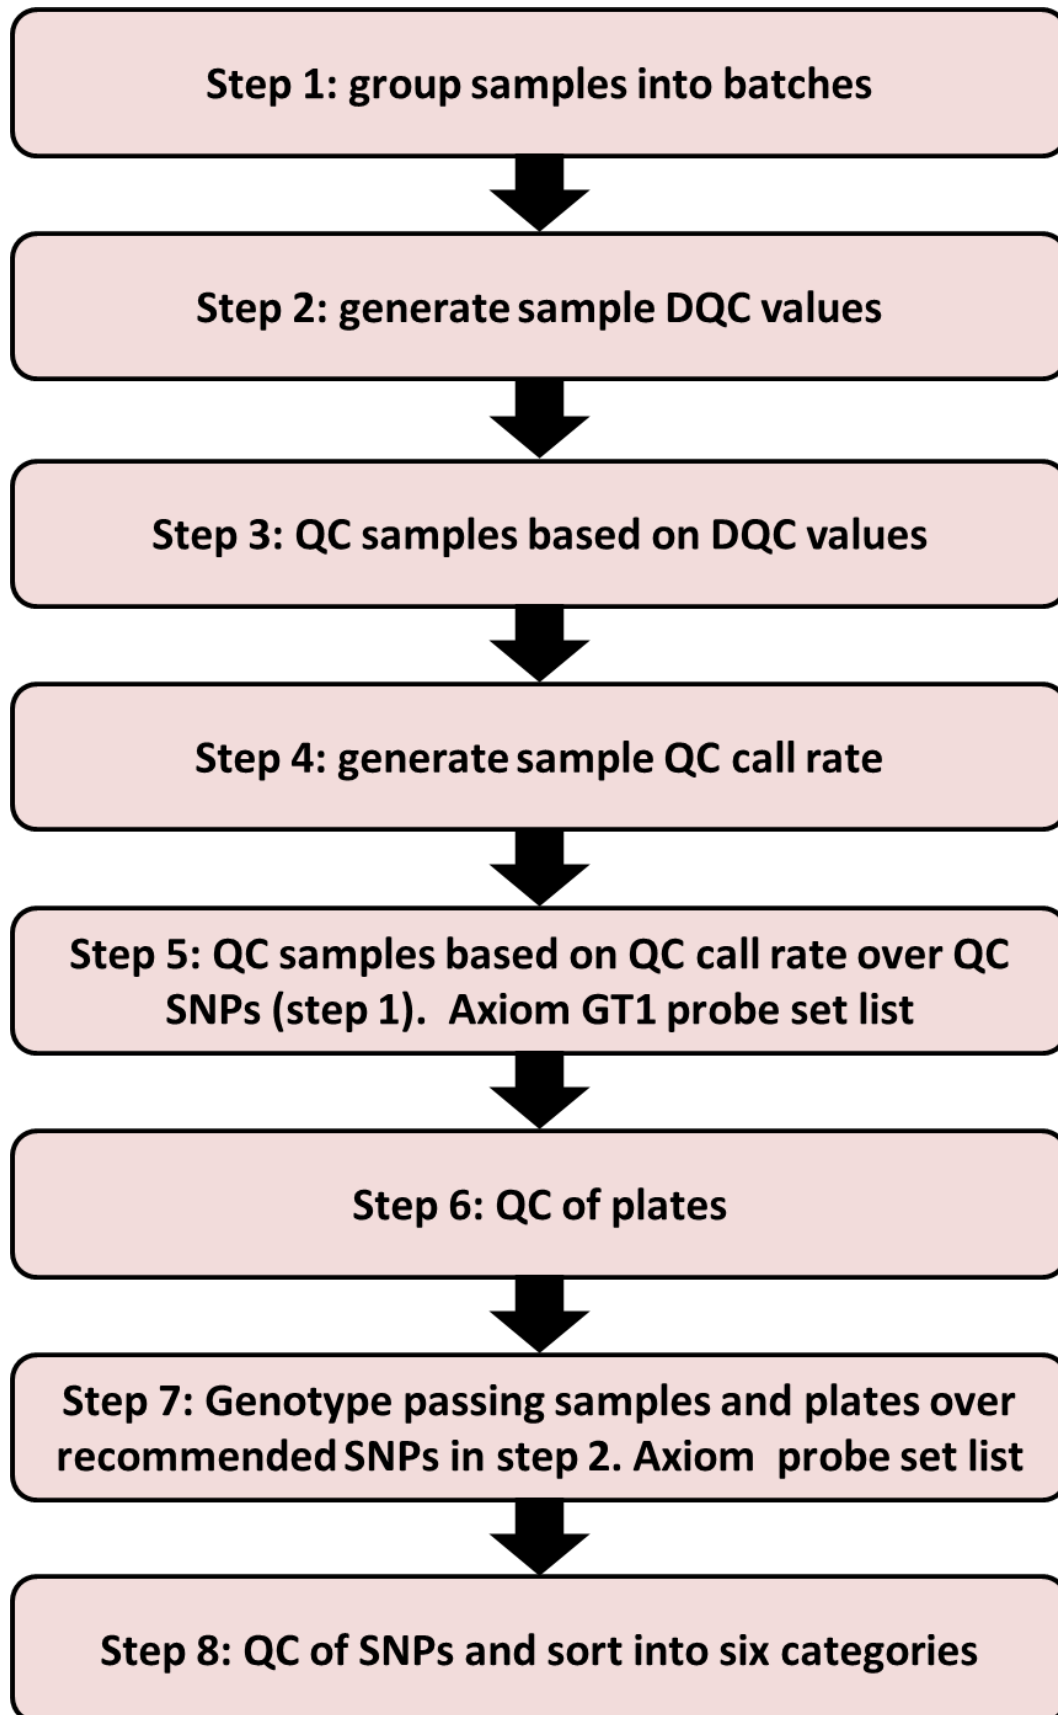

Application of these filters resulted in 1,495 cases, 3,554 controls and 432,097 variants. The genomic inflation  $\lambda$  is 1.03.

**Supplemental Figure 17. Quality control steps and PCA plots to analyze population stratification**

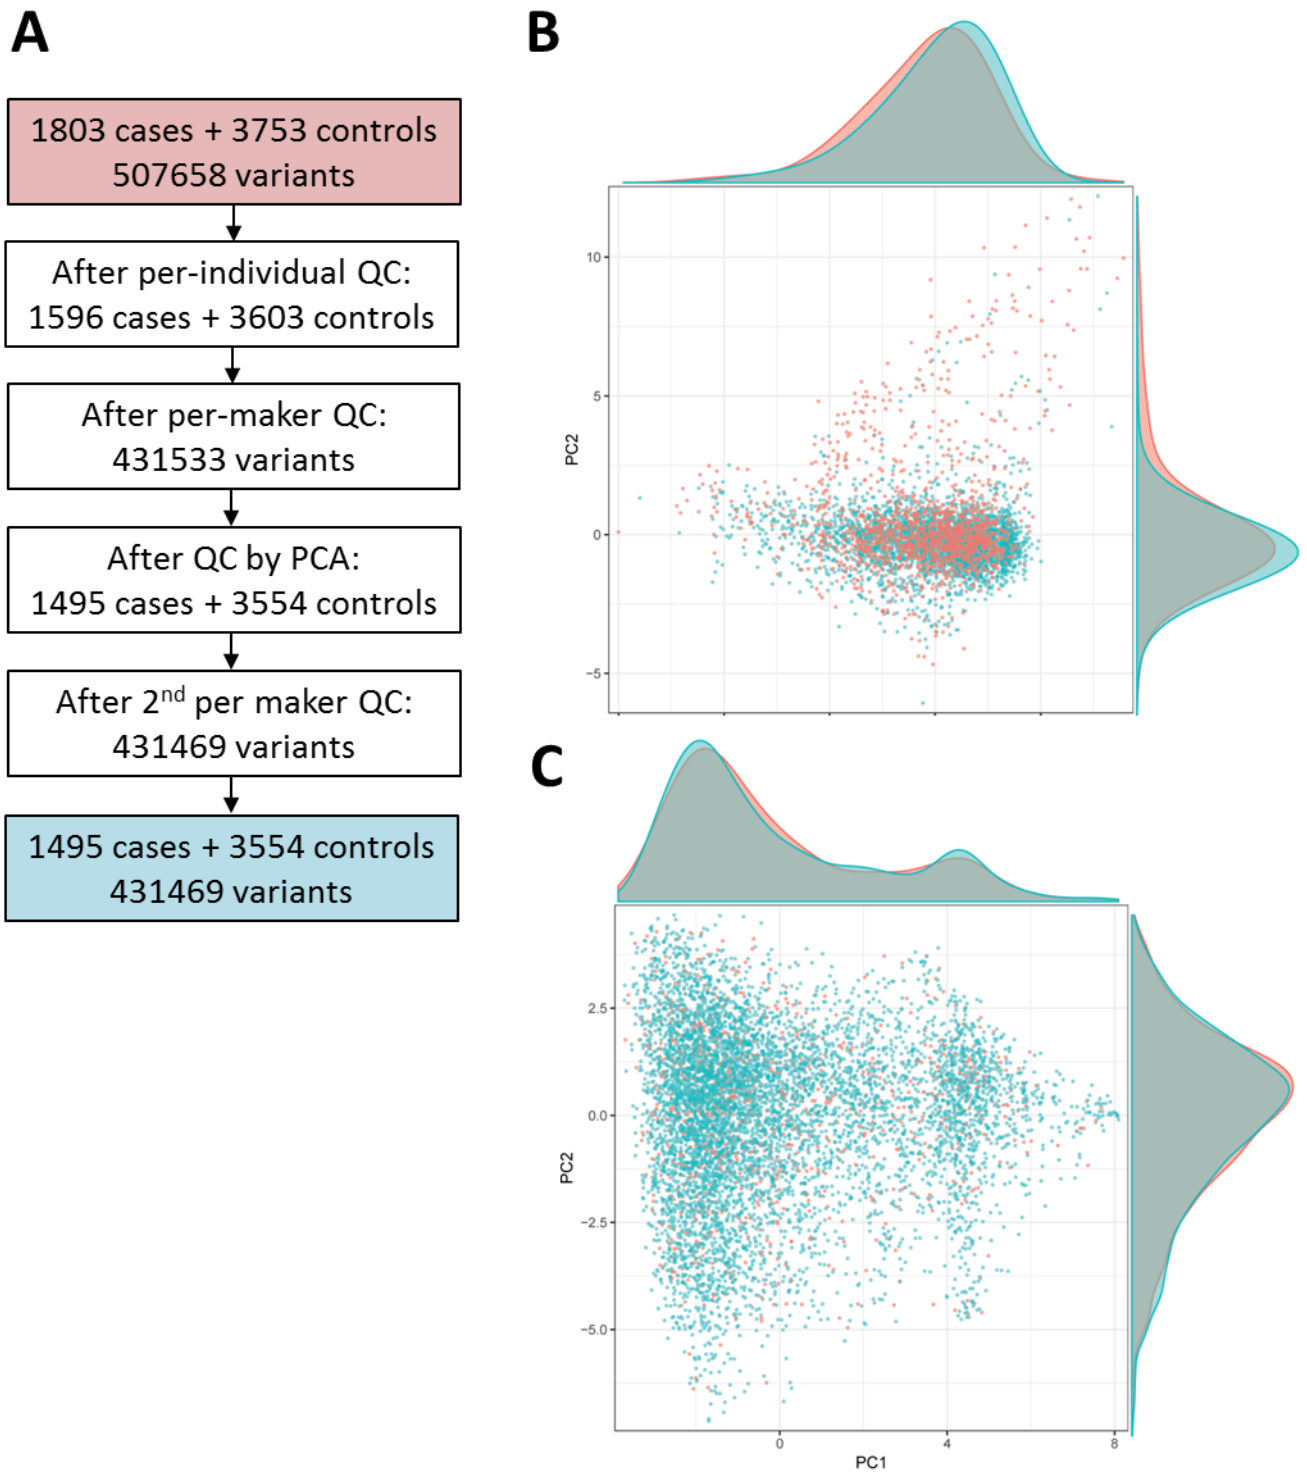

**A:** Quality control steps. **B, C:** Scatter plots with density plots in the margins for PC1 and PC2. The red dots are cases and the blue ones are the controls. **B:** DHM cohort. **C:** British cohort.
